1 **Title:** Structural basis for the inhibition of the *Bacillus subtilis* c-di-AMP cyclase CdaA by the  
2 phosphoglucomutase GlmM

3  
4 **Monisha Pathania<sup>a</sup>, Tommaso Tosi<sup>a</sup>, Charlotte Millership<sup>a</sup>, Fumiya Hoshiga<sup>a</sup>, Rhodri M. L.  
5 Morgan<sup>b</sup> Paul S. Freemont<sup>c,d,e,#</sup>, Angelika Gründling<sup>a,#</sup>**

6  
7  
8 <sup>a</sup> Section of Molecular Microbiology and Medical Research Council Centre for Molecular Bacteriology  
9 and Infection, Imperial College London, London SW7 2AZ, United Kingdom

10 <sup>b</sup> Department of Life Sciences, Imperial College London, London SW7 2AZ, United Kingdom

11 <sup>c</sup> London Biofoundry, Imperial College Translation and Innovation Hub, White City Campus, 80 Wood  
12 Lane, London, W12 0BZ, United Kingdom

13 <sup>d</sup> Section of Structural and Synthetic Biology, Department of Infectious Disease, Imperial College  
14 London, London, SW7 2AZ, United Kingdom

15 <sup>e</sup> UK Dementia Research Institute Centre for Care Research and Technology, Imperial College London,  
16 London, United Kingdom

17  
18  
19 <sup>#</sup>To whom correspondence should be addressed:

20 Paul S. Freemont – p.freemont@imperial.ac.uk,

21 Angelika Gründling – a.grundling@imperial.ac.uk

22  
23  
24 **Running title:** *B. subtilis* CdaA:GlmM complex

25 **Key words:** Bacillus, cyclic dinucleotide, signalling, crystallography, protein structure

26  
27  
28  
29

## 30 Abstract

31 Cyclic-di-adenosine monophosphate (c-di-AMP) is an important nucleotide signalling molecule, which  
32 plays a key role in osmotic regulation in bacteria. Cellular c-di-AMP levels are tightly regulated, as both  
33 high and low levels have a negative impact on bacterial growth. Here, we investigated how the activity  
34 of the main *Bacillus subtilis* c-di-AMP cyclase CdaA is regulated by the phosphoglucomutase GlmM.  
35 c-di-AMP is produced from two molecules of ATP by proteins containing a deadenylate cyclase (DAC)  
36 domain. CdaA is a membrane-linked cyclase with an N-terminal transmembrane domain followed by  
37 the cytoplasmic DAC domain. Here we show, using the soluble catalytic *B. subtilis* CdaA<sub>CD</sub> domain and  
38 purified full-length GlmM or the GlmM<sub>F369</sub> variant lacking the C-terminal flexible domain 4, that the  
39 cyclase and phosphoglucomutase form a stable complex *in vitro* and that GlmM is a potent cyclase  
40 inhibitor. We determined the crystal structure of the individual *B. subtilis* CdaA<sub>CD</sub> and GlmM proteins,  
41 both of which form dimers in the structures, and of the CdaA<sub>CD</sub>:GlmM<sub>F369</sub> complex. In the complex  
42 structure, a CdaA<sub>CD</sub> dimer is bound to a GlmM<sub>F369</sub> dimer in such a manner that GlmM blocks the  
43 oligomerization of CdaA<sub>CD</sub> and formation of active head-to-head cyclase oligomers, thus providing  
44 molecular details on how GlmM acts as cyclase inhibitor. The function of a key amino acid residue in  
45 CdaA<sub>CD</sub> in complex formation was confirmed by mutagenesis analysis. As the amino acids at the  
46 CdaA<sub>CD</sub>:GlmM interphase are conserved, we propose that the observed inhibition mechanism of CdaA  
47 by GlmM is conserved among Firmicutes.

## 48 49 Introduction

50 Nucleotide signalling molecules play important roles in helping bacteria to rapidly adapt to  
51 changing environmental conditions (1,2). One such signalling nucleotide, cyclic-di-adenosine  
52 monophosphate (c-di-AMP), which was discovered a little more than a decade ago (3), plays an  
53 important function in the osmotic regulation of bacteria by controlling potassium and osmolyte uptake  
54 (4-8). c-di-AMP also plays an important function in regulating cell size, either directly or indirectly  
55 through its function in osmotic regulation, cell-wall integrity and susceptibility to beta-lactam  
56 antibiotics, which target the synthesis of the peptidoglycan cell wall (9-12).

57 The function of c-di-AMP has been most extensively studied in a range of Firmicutes bacteria  
58 including the Gram-positive model organism *Bacillus subtilis* and Gram-positive bacterial pathogens  
59 such as *Staphylococcus aureus*, *Listeria monocytogenes* and several *Streptococcus* species (9,10,13-17).  
60 From these studies, it has become apparent that the cellular level of c-di-AMP needs to be tightly  
61 regulated as both an excess and a lack of c-di-AMP can negatively impact bacterial growth, physiology  
62 and virulence (17,18). To achieve the optimal level, a dynamic equilibrium must exist between the  
63 synthesis of c-di-AMP via diadenylate cyclases and its degradation into 5'-phosphadenylyl-adenosine  
64 (pApA) or two molecules of AMP by phosphodiesterases (18-20). As part of the current study, we  
65 investigated how the activity the *B. subtilis* c-di-AMP cyclase CdaA is regulated by GlmM, a  
66 phosphoglucomutase enzyme required for the synthesis of an essential peptidoglycan precursor.

67 c-di-AMP is formed from two molecules of ATP by enzymes containing a diadenylate cyclase  
68 (DAC) domain. These enzymes have been extensively characterized structurally as well as  
69 biochemically, but how their activity is regulated is an aspect that remains poorly understood. *B. subtilis*  
70 codes for three diadenylate cyclase enzymes (3,21-24). CdaA (also referred to as DacA in some bacteria)  
71 is a membrane-bound cyclase with three predicted N-terminal transmembrane helices and a cytoplasmic  
72 catalytic DAC domain. CdaA (DacA) is the “housekeeping” c-di-AMP cyclase in Firmicutes, as it is  
73 conserved and often the sole c-di-AMP cyclase in phylum (25,26). The two other *B. subtilis* c-di-AMP  
74 cyclases, DisA and CdaS, are soluble proteins, not as widely distributed among bacteria and have more  
75 specialized functions, with DisA involved in controlling DNA-repair processes during sporulation or  
76 spore outgrowth and CdaS also specifically expressed during the sporulation process (22,23,27). While  
77 there are no publications on the 3D-structures of the *B. subtilis* c-di-AMP cyclases, structures are  
78 available for the cytoplasmic enzymatic domains of the *L. monocytogenes* and *S. aureus* CdaA/DacA  
79 homologs (21,28), the DisA homolog from *Thermotoga maritima* (3) and the CdaS homolog from *B.*  
80 *cereus* (PDB 2FB5). These studies revealed that DAC domains have a mixed  $\alpha\beta$ -fold, with highly  
81 conserved DGA and RHR amino acid motifs required for ligand binding (3,21,29). Formation of c-di-  
82 AMP requires a head-to-head conformation of two DAC domains. This was first demonstrated in the  
83 crystal structure of DisA, a protein which forms an octamer with four DAC domain dimers in the active  
84 head-to-head conformation (3). While also the *L. monocytogenes* and *S. aureus* CdaA/DacA catalytic

85 domains and the CdaS protein, where present as dimers and hexamers, respectively, they were in an  
86 inactive conformation. These proteins therefore either need to rearrange or more likely form higher  
87 oligomers in order to yield active enzymes with DAC domains in the head-to-head dimer conformation  
88 (24,28). Recently, another structure of the cytoplasmic catalytic domain of the *L. monocytogenes* CdaA  
89 enzyme ( $\Delta 100\text{CdaA}$ ) has been reported with a c-di-AMP bound between two monomers, which based  
90 on the crystal cell packing, were arranged in an active dimer of dimer configuration (30). These findings  
91 are consistent with the idea that CdaA (DacA) enzymes will need to form higher oligomers to achieve  
92 an active enzyme configuration. Hence, factors influencing the ability of c-di-AMP cyclases to rearrange  
93 into an active conformation or to form higher oligomers will be able to regulate the activity of these  
94 enzymes.

95 The genetic arrangement and operon structure coding for the “housekeeping” c-di-AMP cyclase  
96 CdaA (DacA) is conserved in Firmicutes (29,31). Two genes, coding for the membrane-linked CdaA  
97 regulator CdaR (also named YbbR in some bacteria) and cytoplasmically-located peptidoglycan  
98 precursor synthesis enzyme GlmM, are found downstream and in an operon with *cdaA* (29,31). Through  
99 recent studies in *B. subtilis*, *L. monocytogenes*, *Lactococcus lactis* and *S. aureus*, it has become  
100 apparent that these three genes are not only co-transcribed but that the encoded proteins also form a  
101 complex and that CdaR and GlmM can regulate the activity of the c-di-AMP cyclase CdaA (29,32,33).  
102 While CdaR has been reported to function as both an activator and repressor of CdaA activity depending  
103 on the growth conditions, GlmM has been shown to be a potent inhibitor of the cyclase activity  
104 (17,29,31,32,34). However, the molecular mechanisms on how the CdaA cyclase activity is regulated  
105 by these proteins are not yet known and this was further investigated as part of this study.

106 GlmM is a phosphoglucomutase enzyme catalysing the conversion of glucosamine-6-phosphate  
107 to glucosamine-1-phosphate, which is subsequently used to produce the essential peptidoglycan  
108 precursor UDP-N-acetyl-glucosamine (35). In *B. subtilis*, *L. monocytogenes* and *L. lactis* a protein-  
109 protein interaction between CdaA and GlmM has been detected using bacterial two-hybrid assays  
110 performed in *Escherichia coli* (29,31,33). In *B. subtilis* this interaction has been further confirmed by *in*  
111 *vivo* protein cross-linking and pulldown assays (29) and in *L. monocytogenes* by the co-elution of  
112 purified proteins (33). The first evidence that GlmM serves as negative regulator of CdaA/DacA activity  
113 came from an *L. lactis* strain that produces a GlmM variant that is thought to form a stronger interaction  
114 with CdaA; this strain produces lower cellular c-di-AMP levels than the bacteria expressing wildtype  
115 GlmM (31). Furthermore, the activity of the soluble recombinant *S. aureus* DacA catalytic domain  
116 ( $\text{DacA}_{\text{CD}}$ ) could be blocked almost completely by the addition of purified GlmM protein in *in vitro*  
117 assays and the recombinant proteins were shown to form a stable complex that could be purified via  
118 size-exclusion chromatography (28). On the other hand, the activity of GlmM was not affected by the  
119 interaction with  $\text{DacA}_{\text{CD}}$  (28). Additional mass-spectrometry and small-angle X-ray scattering data  
120 (SAXS) analyses suggested that the complex is composed of a  $\text{DacA}_{\text{CD}}$  dimer and a GlmM dimer (28).  
121 Crystal structures of the individual *S. aureus*  $\text{DacA}_{\text{CD}}$  and GlmM dimers revealed that the *S. aureus*  
122  $\text{DacA}_{\text{CD}}$  protein assumed an “inactive” dimer conformation. GlmM had the typical four-domain fold of  
123 phosphoglucomutases with a flexible C-terminal domain 4 and the dimer was “M-shaped”,  
124 characteristic for this class of enzymes (28). However, a high-resolution structure of the complex could  
125 not be obtained and only a model for the complex could be proposed by fitting the individual  $\text{DacA}_{\text{CD}}$   
126 and GlmM dimer structures into the SAXS envelope (28). Based on this, a model was proposed in which  
127 GlmM could potentially block the activity of the  $\text{DacA}_{\text{CD}}$  cyclase by preventing the formation of higher  
128 oligomers.

129 Here, we set out to provide atomic resolution information on the CdaA:GlmM complex to gain  
130 insight into the molecular mechanism how GlmM can control the activity of the c-di-AMP cyclase  
131 enzyme. Using the purified *B. subtilis* CdaA catalytic domain ( $\text{CdaA}_{\text{CD}}$ ) and purified full-length GlmM  
132 or the truncated  $\text{GlmM}_{\text{F369}}$  variant lacking the flexible C-terminal domain 4, we show that the two  
133 proteins form a stable complex *in vitro* and that GlmM and  $\text{GlmM}_{\text{F369}}$  are potent inhibitors of the cyclase.  
134 Crystal structures of the *B. subtilis*  $\text{CdaA}_{\text{CD}}$  cyclase, the GlmM phosphoglucomutase and the  
135  $\text{CdaA}_{\text{CD}}:\text{GlmM}_{\text{F369}}$  complex were obtained, revealing dimer conformations of the individual proteins as  
136 well as a dimer of dimer conformation in the complex structure. More importantly, from the complex  
137 structure the mechanism by which binding of GlmM inhibits the cyclase activity becomes apparent, that  
138 is by preventing the oligomerisation of CdaA and formation of active head-to-head cyclase oligomers.  
139

## 140 Results

### 141 The *B. subtilis* phosphoglucosamine GlmM interacts with and inhibits the activity of the c-di-AMP 142 cyclase CdaA<sub>CD</sub>

143 Using the purified *S. aureus* DacA<sub>CD</sub> catalytic domain and GlmM, it has been shown that the proteins  
144 form a stable complex *in vitro* and that GlmM is a potent inhibitor of the c-di-AMP cyclase without  
145 requiring any additional factors (28). To examine if this is also the case for the *B. subtilis* proteins, the  
146 full-length *B. subtilis* GlmM protein as well as the truncated GlmM<sub>F369</sub> variant were expressed and  
147 purified along with the soluble catalytic domain of the *B. subtilis* c-di-AMP cyclase CdaA<sub>CD</sub>. The  
148 GlmM<sub>F369</sub> variant lacks the flexible C-terminal domain 4 and was constructed to aid subsequent  
149 structural investigations. The proteins were expressed as His-tagged proteins in *E. coli* and purified  
150 individually via Ni-NTA affinity chromatography followed by size exclusion chromatography (Fig. 1).  
151 To test for a CdaA-GlmM interaction, lysates of strains producing CdaA<sub>CD</sub> and GlmM (Fig. 1A) or  
152 CdaA<sub>CD</sub> and GlmM<sub>F369</sub> (Fig. 1B) were mixed prior to affinity and size-exclusion chromatography. The  
153 elution profiles and analysis of the retention volumes revealed that CdaA<sub>CD</sub> formed a complex with  
154 GlmM and with GlmM<sub>F369</sub> that eluted as a single, higher-mobility species compared to the individual  
155 proteins (Fig. 1). The peak fractions of each complex were further analysed by SDS-PAGE, confirming  
156 the presence of both proteins (Fig. 1, inserts). We also determined the binding affinity between GlmM  
157 and CdaA<sub>CD</sub> by microscale thermophoresis (MST). For the MST experiments, increasing concentrations  
158 of unlabelled purified GlmM ranging from a final concentration of 0.78  $\mu\text{M}$  to 800  $\mu\text{M}$  were mixed with  
159 fluorescence labelled CdaA<sub>CD</sub> held at a constant final concentration of 25 nM (see experimental  
160 procedure sections for details). Based on the thermophoresis and normalized fluorescence change of  
161 CdaA<sub>CD</sub> depending on the GlmM protein concentration a  $K_d$  of  $14.4 \mu\text{M} \pm 0.962$  was determined (Fig.  
162 1C) indicating a moderate binding affinity. Next, to determine if the *B. subtilis* GlmM protein impacts  
163 the activity of CdaA<sub>CD</sub>, *in vitro* cyclase activity assays were performed, and the conversion of ATP  
164 (spiked with a small amount of  $\alpha$ -<sup>32</sup>P-labelled ATP) into c-di-AMP assessed. The purified *B. subtilis*  
165 CdaA<sub>CD</sub> protein was enzymatically active in the presence of the divalent metal ion  $\text{Mn}^{2+}$  but showed  
166 only limited activity in the presence of  $\text{Co}^{2+}$  or  $\text{Mg}^{2+}$  (Fig. 2A) and after 4 h incubation approximately  
167 50% of the ATP substrate was converted to c-di-AMP (Fig. 2B). Addition of GlmM or GlmM<sub>F369</sub> at a  
168 2:1 molar ratio over CdaA<sub>CD</sub>, led to a significant reduction in the conversion of ATP to c-di-AMP (Fig.  
169 2C). Taken together, these data show that the purified *B. subtilis* CdaA<sub>CD</sub>:GlmM as well as  
170 CdaA<sub>CD</sub>:GlmM<sub>F369</sub> proteins form a stable complex *in vitro* and that both the full-length and truncated  
171 GlmM variant, inhibit the activity of the c-di-AMP cyclase CdaA<sub>CD</sub>.

### 172 173 Crystal structures of the *B. subtilis* CdaA<sub>CD</sub> and GlmM proteins

174 To gain atomic level details of the CdaA<sub>CD</sub> and GlmM protein complex, we started off by determining  
175 the crystal structures of the individual proteins. The tag-less *B. subtilis* CdaA<sub>CD</sub> protein was crystallised  
176 and the structure solved at 2.8 Å (Table 1 and Fig. 3). The protein displayed the expected diadenylate  
177 cyclase protein fold, with a central  $\beta$ -sheet made up of 6 antiparallel strands flanked by 5 helices (Fig.  
178 3A). However, it lacked the seventh  $\beta$  strand that was seen in the structures of CdaA homologs of other  
179 bacteria (21,28). In *B. subtilis* CdaA<sub>CD</sub> the residues corresponding to this  $\beta$ -strand are instead in a loop  
180 that adapts a very similar confirmation to the  $\beta$  strand observed in other CdaA structures. Superposition  
181 of the *B. subtilis* CdaA<sub>CD</sub> structure with the *L. monocytogenes*  $\Delta 100\text{CdaA}$  (PDB 4RV7; sequence  
182 identity of the full-length proteins is 65%) (21), and *S. aureus* DacA<sub>CD</sub> (PDB 6GYW; sequence identity  
183 of the full-length proteins is 53%) (28) structures, all lacking the N-terminal transmembrane helices,  
184 gave r.m.s.ds of 0.79 and 0.75, respectively, highlighting the overall structural similarities of these  
185 enzymes (Fig. 3B). The *B. subtilis* CdaA<sub>CD</sub> structure was solved as a dimer in the asymmetric unit with  
186 hydrogen-bonding interactions observed at the interaction interface (Fig 3C). Interactions were observed  
187 between the side chains of amino acid residues Asn166, Thr172 and Leu174 (site 1) and residues  
188 Leu150, Lys153 and Met155 (site 2) (Fig 3C). Similar hydrogen-bonding interactions were also  
189 identified in the *S. aureus* DacA<sub>CD</sub> and *L. monocytogenes*  $\Delta 100\text{CdaA}$  structures with amino acid residues  
190 in site 1 being absolutely conserved (28,30) (Fig. S1). Analysis of the interface with PDBePISA (36)  
191 indicated a buried surface of  $1400 \text{ \AA}^2$ , which is similar to the value of  $1460 \text{ \AA}^2$  previously reported for  
192 the *S. aureus* DacA<sub>CD</sub> protein, indicative of a stable dimer formation. In this dimer confirmation, the  
193 active sites face opposite directions and hence cannot be engaged in a catalytically active head-to-head  
194 conformation (Fig. 3A). Taken together, these data indicate that the conformationally-inactive

195 dimerization interface is conserved among different CdaA homologs in Gram-positive bacteria and that  
196 the enzyme needs to form higher oligomers for catalysis.  
197 The His-tagged *B. subtilis* GlmM protein was crystallised and the structure solved by molecular  
198 replacement using the *B. anthracis* GlmM structure (PDB 3PDK; (37)) as the search model (Table 1  
199 and Fig. 3D). The *B. subtilis* GlmM protein displayed a four-domain architecture typical for  
200 phosphoglucosamine mutase proteins (28,37) (Fig. 3D). Domains 1-3 are comprised of  $\alpha$ - $\beta$  mixed cores  
201 linked via a flexible loop to domain 4, which displays a 3-stranded  $\beta$  sheet fold surrounded by two  $\alpha$ -  
202 helices (Fig. 3D). While one GlmM molecule was present in the asymmetric unit, the typical “M-  
203 shaped” GlmM dimer arrangement was observed in the crystal cell packing (Fig. S2). Interactions were  
204 formed between domains 1, leading to the formation of a large groove at the top of the dimer molecule,  
205 mostly formed by domain 2 and the active site of each monomer subunit facing the opposite direction.  
206 Two different structures were solved for the *B. subtilis* GlmM protein at 2.9 and 3.0 Å resolutions with  
207 a superposition r.m.s.d. score of 0.29 (Table 1 and Fig. S2). One of the crystal structures was obtained  
208 with a divalent cation bound to the catalytic serine residue, which during catalysis is thought to be  
209 converted to a phosphoserine residue and the metal ion playing an important role during catalysis (Fig.  
210 S2). The exact type of metal ion could not be deduced due to the limitation of the structural resolution.  
211 However, we speculate that it is a magnesium ion, as magnesium was present in the crystallisation  
212 conditions and this metal ion is usually also bound in fully active enzymes. Furthermore, when a  
213 magnesium ion was modelled into the structure and analyzed using the program CheckMyMetal (38), a  
214 better fit was observed as compared to zinc or calcium ions, which could also fill the density. In the  
215 second structure, a phosphate molecule ( $\text{PO}_4$ ) was bound to Arg419, located within a loop region in  
216 domain 4 (Fig S2B) at a similar location as observed in the *B. anthracis* GlmM structure (37). The  
217 superimposition of the *B. subtilis* GlmM structure with the *S. aureus* (6GYZ; (28)) and *B. anthracis*  
218 (3PDK; (37)) GlmM structures, gave small r.m.s.d. values of 1.0261 and 1.0668, respectively (Fig. 3E),  
219 indicating high similarity. However, the inter-residue distance between Arg419 in the phosphate binding  
220 site in domain 4 and the catalytic Ser100 in domain 1 was 20.22 Å in the phosphate bound *B. subtilis*  
221 GlmM structure compared to 18.4 Å in the *S. aureus* GlmM (PDB 6GYZ) or 15.18 Å in the *B. anthracis*  
222 GlmM (PDB 3PDK) structures (Fig. 3F). This highlights the flexibility of domain 4 in GlmM enzymes  
223 and also reveals that the *B. subtilis* GlmM protein was captured in most open state of the enzyme  
224 reported so far in a crystal structure.  
225

### 226 **Structure of the *B. subtilis* CdaA<sub>CD</sub>:GlmM<sub>F369</sub> complex**

227 To understand how GlmM interacts and inhibits the CdaA, we next aimed to obtain the structure of the  
228 complex. Any crystals obtained for the *B. subtilis* CdaA<sub>CD</sub>:GlmM complex diffracted poorly. On the  
229 other hand, diffracting crystals were obtained for the CdaA<sub>CD</sub>:GlmM<sub>F369</sub> complex, in which the GlmM  
230 protein lacks the flexible C-terminal domain 4. The crystals were obtained under two different  
231 conditions (see experimental procedures section), and the structure of the CdaA<sub>CD</sub>:GlmM<sub>F369</sub> complex  
232 could be solved at 3.6 Å (Complex 1) and at 4.2 Å (Complex 2) by molecular replacement using the *B.*  
233 *subtilis* CdaA<sub>CD</sub> and GlmM (dimer) structures as search models (Table 1 and Fig. 4, Fig. S3). While  
234 obtained under two different conditions, complex 1 and complex 2 were nearly identical and overlapped  
235 with an r.m.s.d of 0.22 Å (Fig. S4A). Furthermore, in both complex structures, three complex molecules  
236 were obtained in the asymmetric unit and each complex was composed of a GlmM<sub>F369</sub> dimer and a  
237 CdaA<sub>CD</sub> dimer in the inactive dimer configuration (Fig. 4 and Fig. S3). The three complexes obtained  
238 in the asymmetric unit were almost identical to each other, as indicated by the superposition r.m.s.d. of  
239 0.15 Å to 0.20 Å for complex 1 (Fig. S4B) and of 0.15 Å to 0.16 Å for complex 2 (Fig. S4C). Since the  
240 obtained complex structures were basically identical, all further descriptions are based on the higher  
241 resolution complex 1 structure. In the complex, a CdaA<sub>CD</sub> dimer was positioned in the large groove at  
242 the top of the GlmM<sub>F369</sub> dimer and formed interactions with domain 2 of GlmM (Fig 4A-4C). The  
243 complex was asymmetric, with one of the CdaA<sub>CD</sub> monomer, CdaA<sub>CD</sub>(2) (shown in light blue in Fig. 4)  
244 placed in the center of the GlmM<sub>F369</sub> groove and the other monomer, CdaA<sub>CD</sub>(1) (shown in dark blue in  
245 Fig. 4) projecting towards the solvent. Similarly, most of the interactions of the GlmM<sub>F369</sub> dimer with  
246 the CdaA<sub>CD</sub> dimer were made by GlmM<sub>F369</sub>(1) (shown in dark pink in Fig 4). PDBePISA analysis  
247 revealed an average buried surface area of 996 Å<sup>2</sup> in the interface between GlmM<sub>F369</sub>(1) and the CdaA<sub>CD</sub>  
248 dimer, which was stabilized by 4 hydrogen bond and 4 ionic bond interactions between GlmM<sub>F369</sub>(1)  
249 and CdaA<sub>CD</sub>(1) and 5 hydrogen bond and 3 ionic bond interactions with CdaA<sub>CD</sub>(2) (Table S1 and Fig.

250 S5). On the other hand, only an average 220.3 Å<sup>2</sup> surface area is occluded in GlmM<sub>F369</sub>(2) (shown in  
251 light pink in Fig. 4). Based on the PDBePISA analysis, GlmM<sub>F369</sub>(2) only formed two hydrogen bond  
252 interactions with the CdaA<sub>CD</sub>(2) monomer but no interaction with CdaA<sub>CD</sub>(1) (Table S1 and Fig. S5). A  
253 more detailed analysis of the interface showed that several interactions are made between two α-helices  
254 from domain 2 of GlmM<sub>F369</sub>(1), α1 and α2, with the CdaA<sub>CD</sub>(1) and CdaA<sub>CD</sub>(2) monomers, respectively  
255 (Fig 4C and 4D). The main interactions in the complex were formed between three residues, D151,  
256 E154, and D194 of domain 2 in GlmM<sub>F369</sub>(1) and residue R126 in each of the CdaA<sub>CD</sub> monomers. More  
257 specifically, ionic bonds were formed between residue D195 in GlmM<sub>F369</sub>(1) and residue R126 in  
258 CdaA<sub>CD</sub>(2). In addition, salt bridges were formed between residues D151 and E154 in GlmM<sub>F369</sub>(1) and  
259 residue R126 but this time from CdaA<sub>CD</sub>(1) (Fig 4C and 4D, Table S2 and Fig. S5). The data suggest  
260 that residue R126 in CdaA<sub>CD</sub> is potentially one of the most critical residues for complex formation, as it  
261 contributes to a number of ionic as well as hydrogen-bond interactions and even though the complex is  
262 asymmetric, it contributes to interactions in both CdaA<sub>CD</sub> monomers.  
263

### 264 CdaA<sub>CD</sub> cannot form active oligomers in complex with GlmM

265 To gain insight how GlmM inhibits the activity of the c-di-AMP cyclase, we inspected the location of  
266 the active sites of CdaA<sub>CD</sub> in the complex. The active site of DAC-domain enzymes is characterized by  
267 DGA and RHR motifs, corresponding to residues D<sub>171</sub>GA and R<sub>203</sub>HR in *B. subtilis* CdaA (Fig. 5; areas  
268 highlighted in yellow and green in the CdaA<sub>CD</sub> monomers). The active site in CdaA<sub>CD</sub>(2) was completely  
269 occluded upon interaction with the GlmM<sub>F369</sub> dimer (Fig. 5, dark blue CdaA<sub>CD</sub> monomer with active site  
270 region highlighted in yellow) but the active site in CdaA<sub>CD</sub>(1) appeared at least partially exposed (Fig.  
271 5; light blue CdaA<sub>CD</sub> monomer with active site region highlighted in green). For CdaA<sub>CD</sub> to produce c-  
272 di-AMP active head-to-head dimers need to be formed (3). The crystal structure of the *L. monocytogenes*  
273 Δ100CdaA cyclase was recently determined with a c-di-AMP molecule bound in the catalytic site and  
274 an active head-to-head dimer conformation seen in the crystal packing (30). Using the *L. monocytogenes*  
275 Δ100CdaA structure (PDB 6HVL) as model, an active *B. subtilis* CdaA<sub>CD</sub> dimer was modelled and  
276 superimposed on CdaA<sub>CD</sub>(1) in the complex structure (Fig. 5). Although the active site of the CdaA<sub>CD</sub>(1)  
277 was exposed and accessible in the complex with GlmM<sub>F369</sub>, in an active dimer conformation, parts of  
278 the second CdaA<sub>CD</sub> molecule would collide and overlap with GlmM<sub>F369</sub>, highlighting that also  
279 CdaA<sub>CD</sub>(1) cannot form active head-to-head oligomers in the complex (Fig. 5). Taken together, these  
280 data indicate that in the complex, the interaction of GlmM with CdaA<sub>CD</sub> will prevent the formation of  
281 functional diadenylate cyclase enzyme oligomers, which is essential for the formation of c-di-AMP. The  
282 crystal structure of the CdaA<sub>CD</sub>:GlmM<sub>F369</sub> complex therefore provides insight on an atomic level on the  
283 catalytic inhibition of the diadenylate cyclase CdaA<sub>CD</sub> by the phosphoglucosamine enzyme GlmM.  
284

### 285 Small angle X-ray scattering analysis of *B. subtilis* CdaA<sub>CD</sub>:GlmM complex

286  
287 To determine whether the full-length *B. subtilis* GlmM protein interacts with CdaA<sub>CD</sub> in a similar  
288 manner as observed for GlmM<sub>F369</sub>, a structural characterisation of the CdaA<sub>CD</sub>:GlmM complex was  
289 performed via small-angle X-ray scattering (SAXS). To this end, the individual purified *B. subtilis*  
290 CdaA<sub>CD</sub> and GlmM proteins as well as the purified CdaA<sub>CD</sub>:GlmM complex and as control the  
291 CdaA<sub>CD</sub>:GlmM<sub>F369</sub> complex, were passed over an analytical size-exclusion column, followed by  
292 continuous automated SAXS data collection throughout the run (Fig. 6, Fig S6 and Table S2). For  
293 CdaA<sub>CD</sub> and GlmM, the reconstructed maps were consistent with the proteins forming dimers and the  
294 maps were a good fit for the *B. subtilis* CdaA<sub>CD</sub> dimer (Fig. 6A) and GlmM dimer (Fig. 6B) structures,  
295 respectively. The reconstructed map for the CdaA<sub>CD</sub>:GlmM complex ( $V_c$ : 890.1,  $R_g$ : 44.65 Å and  $d_{max}$ :  
296 161 Å) was bigger in volume and dimensions as compared to the individual maps calculated for GlmM  
297 ( $V_c$ : 625.8;  $R_g$ : 37.29 Å,  $d_{max}$ : 122 Å) and CdaA<sub>CD</sub> ( $V_c$ : 373.2,  $R_g$ : 26.94 Å,  $d_{max}$ : 88 Å), which is  
298 consistent with the formation of a complex. From the Guinier plot analysis, the molecular weight of the  
299 *B. subtilis* CdaA<sub>CD</sub>:GlmM complex was calculated to be 130 kDa, which is consistent with the  
300 theoretical molecular weight of 144.46 kDa for a complex made of two CdaA<sub>CD</sub> and two GlmM  
301 molecules. To fit a CdaA<sub>CD</sub>:GlmM dimer complex into the reconstructed map, a model of the complex  
302 with full-length GlmM was first constructed by superimposing the crystal structure of full-length GlmM  
303 onto the CdaA<sub>CD</sub>:GlmM<sub>F369</sub> complex structure. The resulting complex model was subsequently fitted in  
304 the reconstituted SAXS envelope of the complex. A good fit of the CdaA<sub>CD</sub>:GlmM dimer model

305 complex into the reconstructed envelope was observed, however an elongated density on one side  
306 remained unoccupied (Fig. 6C). It is plausible that the flexible C-terminal domain 4 of the GlmM protein  
307 is responsible for this extra density. As control, a SAXS experiment was also performed using the  
308 CdaA<sub>CD</sub>:GlmM<sub>F369</sub> complex sample for which the X-ray structure was obtained. The dimensions of the  
309 CdaA<sub>CD</sub>:GlmM<sub>F369</sub> complex were  $V_c$ : 656.8,  $R_g$ : 37.51 Å and  $d_{max}$ : 117.5 Å and the molecular weight  
310 was calculated to be 97.5 kDa, which is consistent with the theoretical molecular weight of 120 kDa for  
311 a complex made of two CdaA<sub>CD</sub> and two GlmM<sub>F369</sub> molecules. Similarly, a good fit of the  
312 CdaA<sub>CD</sub>:GlmM<sub>F369</sub> dimer complex structure was obtained when fitted into the reconstructed SAXS  
313 envelope data (Fig 6D). These data suggest that the full-length GlmM protein likely forms a dimer-of-  
314 dimer complex with the c-di-AMP cyclase CdaA<sub>CD</sub> and might assume a similar arrangement as observed  
315 for the CdaA<sub>CD</sub>:GlmM<sub>F369</sub> complex.

### 316 **Arginine 126 in *B. subtilis* CdaA<sub>CD</sub> is essential for complex formation**

317 The complex structure highlighted key interactions between residues D194 and residues D151/E154 in  
318 GlmM with residue R126 in each of the CdaA<sub>CD</sub> monomers (Fig. 5D). To confirm our structural  
319 findings, a site-directed mutagenesis analysis was performed. To this end, D195A, D151A/E154A and  
320 D151A/E154A/D191A alanine substitution GlmM variants were created. Furthermore, residue R126 in  
321 CdaA<sub>CD</sub>, which in both monomers makes contacts with GlmM, was mutated to an alanine. The different  
322 alanine substitution variants were expressed and purified from *E. coli* and complex formation assessed  
323 by size-exclusion chromatography. While our initial experiments using the GlmM single, double and  
324 triple alanine substitution variants appeared not or only marginally to affect complex formation with  
325 CdaA<sub>CD</sub> (Fig. S7), no complex-specific peak was observed when the interaction between the CdaA<sub>CD</sub>-  
326 R126A variant and GlmM was assessed. Instead, two peaks were observed for the CdaA<sub>CD</sub>-  
327 R126A:GlmM sample, one corresponding to the retention volume of GlmM and the another to CdaA<sub>CD</sub>-  
328 R126A (Fig. 7A). Analysis of the elution fractions from the CdaA<sub>CD</sub>-R126A/GlmM sample by SDS-  
329 PAGE and Coomassie staining showed that only a very small fraction of the CdaA<sub>CD</sub>-R126A protein  
330 co-eluted with GlmM (Fig. 7A). These data highlight that, consistent with the structural data, residue  
331 R126 in CdaA<sub>CD</sub> plays a key role for the complex formation with GlmM. Based on these data, it can be  
332 predicted that the cyclase activity of the CdaA<sub>CD</sub>-R126A variant should now longer be inhibited by  
333 GlmM. To test this experimentally, *in vitro* cyclase enzyme activity assays were performed. The  
334 CdaA<sub>CD</sub>-R126A variant was active, although the activity was reduced as compared to wild-type CdaA<sub>CD</sub>  
335 (Fig. 7B). Importantly and in contrast to wild-type CdaA<sub>CD</sub>, the enzyme activity of this variant was no  
336 longer inhibited by the addition of GlmM (Fig. 7B). These data show that residue Arg126 in *B. subtilis*  
337 CdaA<sub>CD</sub> plays a critical role for complex formation and that GlmM can only inhibit the activity of the  
338 c-di-AMP cyclase after the formation of a stable complex.

### 340 **Discussion**

341 In this study, we show that the *B. subtilis* GlmM and CdaA<sub>CD</sub> cyclase domain form a stable  
342 dimer-of-dimer complex. GlmM acts through this protein-protein interaction as a potent inhibitor of the  
343 c-di-AMP cyclase without requiring any additional factors. Based on the atomic-resolution complex  
344 structure data, we suggest that GlmM inhibits the activity of CdaA<sub>CD</sub> by preventing the formation of  
345 active head-to-head cyclase oligomers.

346 For CdaA to produce c-di-AMP, two monomers need to be arranged in an active head-to-head  
347 conformation. As part of this study, we determined the structure of the *B. subtilis* CdaA<sub>CD</sub> protein and  
348 show that it has the typical DAC domain fold. While the protein was also found as a dimer in the  
349 structure, the dimer was in an inactive conformation, with the two active sites facing in opposite  
350 directions. The interface creating the inactive dimer conformation is conserved among CdaA proteins.  
351 The *L. monocytogenes* and *S. aureus* homologs, for which structures are available, were found in the  
352 same inactive dimer conformation even though the proteins crystallized under different conditions and  
353 were found in different space groups (21,28,30). This makes it less likely that a crystallographic  
354 symmetry artefact is responsible for the observed inactive dimer configuration. In addition to the  
355 inactive dimer configuration within an asymmetric unit, an active dimer conformation was observed in  
356 the *L. monocytogenes* Δ100CdaA protein by inspecting adjacent symmetry units (30). However, no such  
357 active dimer head-to-head conformations were identified for the *B. subtilis* CdaA<sub>CD</sub> protein across  
358 different symmetry units in the current structure. While not further investigated as part of this study,  
359

360 previous work on the *S. aureus* homolog indicated that the inactive dimer conformation is very stable,  
361 and in order for the protein to produce an active enzyme, the protein needs to form higher-level  
362 oligomers (28). Given the similarity in the interaction interface, this is likely also the case for the *B.*  
363 *subtilis* CdaA<sub>CD</sub> enzyme and we would suggest that the *B. subtilis* CdaA<sub>CD</sub> dimer observed in the  
364 structure is unlikely to rearrange into an active dimer conformation.

365 We also solved the structure of the *B. subtilis* GlmM enzyme. The protein assumed the typical  
366 4-domain architecture previously reported for GlmM enzymes (28,37) and the “M shape” in the dimer  
367 conformation, which in the case of the *B. subtilis* GlmM protein was formed across two adjacent  
368 crystallographic units. The *B. subtilis* GlmM structure further highlighted the flexibility of the most C-  
369 terminal domain 4, which was found in the most open conformation seen in any GlmM protein structure  
370 up to date. The conformational flexibility of domain 4 is probably also a main factor why we were  
371 unsuccessful in determining the structure of a complex between CdaA<sub>CD</sub> and full-length GlmM.  
372 However, GlmM domain 4 is not required for the interaction with and inhibition of CdaA<sub>CD</sub>, since a *B.*  
373 *subtilis* GlmM variant lacking domain 4 formed a complex and inhibited the activity of *B. subtilis*  
374 CdaA<sub>CD</sub>. Furthermore, by using the *B. subtilis* GlmM<sub>F369</sub> variant lacking the flexible domain 4, we were  
375 able to obtain the structure of the CdaA<sub>CD</sub>:GlmM<sub>F369</sub> complex, revealing for the first time structural  
376 details at the atomic level for this complex, thereby identifying the amino acids important for the  
377 interaction between the two proteins. Several electrostatic interactions were detected between  
378 CdaA<sub>CD</sub>:GlmM<sub>F369</sub>: between the negatively charged residues D151, E154 and D195 in domain 2 of *B.*  
379 *subtilis* GlmM<sub>F369</sub> with the positively charged residue R126 in CdaA<sub>CD</sub>. We could further show that  
380 replacing residue R126 in CdaA<sub>CD</sub> with an alanine abolished complex formation and the activity of the  
381 CdaA<sub>CD</sub>-R126 variant was no longer inhibited by GlmM. A direct protein-protein interaction between  
382 CdaA and GlmM has now been reported for these proteins in several Firmicutes bacteria, and hence the  
383 amino acids required for the interaction might be conserved. Indeed, a ConSurf (39) analysis using 250  
384 CdaA protein sequences, showed that the residue corresponding to R126 in *B. subtilis* CdaA is conserved  
385 between the different homologs (Fig. S8). Likewise, all the three negatively charged residues, D151,  
386 E154 and D195 in GlmM, which mediate the primary electrostatic interactions with R126 of CdaA<sub>CD</sub>,  
387 are highly conserved (Fig. S8). In previous work, we have shown, that the *S. aureus* DacA<sub>CD</sub> (the CdaA<sub>CD</sub>  
388 homolog) does not interact with GlmM proteins from *E. coli* and *Pseudomonas aeruginosa*, two Gram-  
389 negative bacteria (28). While negatively charged amino acids corresponding to residues E154 and D195  
390 in *B. subtilis* GlmM are also found in the GlmM protein from the Gram-negative bacteria (D153 and  
391 E194 in *E. coli* and D152 and E193 in *P. aeruginosa*), the amino acids at the equivalent position of  
392 D151 in *B. subtilis* GlmM is an arginine residue (R150 in *E. coli* and R149 in *P. aeruginosa*), which  
393 may hinder the complex formation between CdaA (DacA), and GlmM proteins of Gram-negative  
394 bacteria (28).

395 In a previous work, we proposed a model whereby GlmM inhibits the activity of CdaA cyclase activity  
396 by preventing the formation of active head-to-head oligomers (28). In the absence of an actual atomic  
397 resolution structure of the complex, this model was based on SAXS envelope data and fitting individual  
398 protein structures. The model predicted that the likely interaction site between CdaA and GlmM proteins  
399 is domain 2 of GlmM (28). The structure of *B. subtilis* CdaA<sub>CD</sub>:GlmM<sub>F369</sub> complex we present here now  
400 provides experimental evidence for such a model and shows that GlmM indeed inhibits the activity of  
401 the CdaA cyclase *in vitro* by preventing the formation of active head-to-head oligomers. The  $K_d$  between  
402 CdaA<sub>CD</sub> and GlmM was in the  $\mu\text{M}$  range, which will likely allow complex formation and dissociation  
403 in response to changes in protein levels and/or changes in cellular or environmental conditions. GlmM  
404 is an essential metabolic enzyme required for the synthesis of the peptidoglycan precursor glucosamine-  
405 1-P and thought to be predominantly located within the cytoplasm of the cell (33). However based on  
406 the work presented in this study and previous findings, it is assumed that under certain conditions, a  
407 fraction of GlmM will localize to the bacterial membrane and interact with and inhibit the activity of  
408 the membrane-linked c-di-AMP cyclase CdaA (DacA) (28,32,33). As a result of this interaction, cellular  
409 c-di-AMP levels would decrease and consequently potassium and osmolyte uptake increase. Recent  
410 work on *L. monocytogenes* suggests that GlmM regulates CdaA during hyperosmotic stress conditions,  
411 as during these conditions, overexpression of GlmM has been shown to result in a decrease in cellular  
412 c-di-AMP levels (33). The resulting activation of potassium and osmolyte transporter due to a drop in  
413 cellular c-di-AMP levels will help cells to counteract the water loss under osmotic stress conditions and  
414 aid in bacterial survival. However, what exact cellular changes caused by the osmotic upshift lead to a



415 relocation of GlmM to the membrane to form a complex with CdaA is currently not known and will  
416 require further investigation.

417 The level of c-di-AMP is regulated by a fine balance between the activities of the cyclase, which  
418 synthesizes c-di-AMP, and the phosphodiesterases, which break it down. Interestingly, these two classes  
419 of enzyme appear to be regulated very differently; whereas the activity of several phosphodiesterases  
420 has been shown to be regulated by small molecules, cyclase activity appears to be regulated through  
421 protein-protein interaction. For example, the stringent response alarmone (p)ppGpp has been shown to  
422 inhibit the activity both GdpP and PgpH enzymes (11,20). Furthermore, binding of heme to the Per-  
423 ARNT-Sim (40) signalling domain in GdpP (which is separate from its DHH/DHHA1 enzymatic  
424 domain that is responsible for the degradation of c-di-AMP) was shown in *in vitro* enzyme assays to  
425 lead to reduced phosphodiesterase activity (40). Interestingly, the ferrous form of heme bound to GdpP  
426 could form a pentacoordinate complex with nitric oxide (NO), resulting in increased c-di-AMP  
427 phosphodiesterase activity. Based on these data it has been suggested that GdpP is a heme or NO sensor,  
428 resulting in decreased or increased activity respectively (41). The function consequence and impact of  
429 (p)ppGpp, heme or NO binding to the phosphodiesterases on bacterial physiology has not yet been fully  
430 investigated. However, from these data it is clear that the activity of the c-di-AMP phosphodiesterases  
431 can be regulated by small molecule ligands.

432 On the other hand, several proteins have been found to interact with and regulate the activity of  
433 c-di-AMP cyclases. The *B. subtilis* DisA protein is involved in monitoring the genomic stability  
434 ensuring that damaged DNA is repaired before cells progress with the sporulation process or exit from  
435 spores (27,42). DisA is encoded in a multi-gene operon and the gene immediately upstream of *disA*  
436 codes for RadA (also referred to as SMS). *B. subtilis* RadA possesses 5' to 3' DNA helicase activity,  
437 contributes to DNA repair and DNA transformation processes in *B. subtilis* and has been shown to  
438 interact and negatively impact the activity of DisA (27). However, the mechanistic basis of how RadA  
439 binding to DisA inhibits the cyclase is currently not known. There is now ample evidence that the  
440 activity of the “house-keeping” membrane-linked c-di-AMP cyclase CdaA is impacted by two  
441 interacting proteins, the membrane-linked regulator protein CdaR and the cytoplasmic  
442 phosphoglucomutase enzyme GlmM (29,33). We have provided experimental evidence for the  
443 mechanistic basis by which GlmM inhibits the activity of CdaA, that is by preventing the formation of  
444 active higher-level oligomers. How CdaR regulates the cyclase activity of CdaA remains unclear.  
445 Recent work on the homologous proteins in *L. monocytogenes* indicated that the interaction of CdaA  
446 with CdaR takes place via the N-terminal transmembrane region of CdaA, GlmM has been shown to  
447 interact directly with the cytoplasmic cyclase domain of CdaA in *S. aureus* (28,33). Here, we show that  
448 this is also the case for the *B. subtilis* GlmM protein, which can bind without the requirement of any  
449 additional factor to the catalytic CdaA<sub>CD</sub> domain. In future works, it will be interesting to determine the  
450 structure of the full-length CdaA enzyme, which might provide further insight into how the enzyme  
451 forms higher oligomers for activity as well as how it interacts with CdaR. Furthermore, it will be  
452 interesting to further investigate the interaction between GlmM and CdaR with CdaA within bacterial  
453 cells to determine if this interaction is dynamic and which stimuli will promote or prevent complex  
454 formation to fine-tune the synthesis of c-di-AMP. Identifying how interacting proteins regulate the  
455 activity of these important cyclases, will provide important insight how bacterial cells maintain proper  
456 levels of c-di-AMP under different growth conditions and in different environments.

## 457 458 **Experimental procedures**

### 459 **Bacterial strains and plasmid construction**

460 All bacterial strains and primers used in this work are listed in Tables S3 and S4, respectively.  
461 pET28b-derived plasmids were constructed for the overproduction of the C-terminal catalytic domain  
462 of the *Bacillus subtilis* CdaA enzyme starting from amino acid Phe97 and referred to as CdaA<sub>CD</sub>, GlmM  
463 and the GlmM<sub>F369</sub> variant comprising residues Met1 to Phe369 but lacking the C-terminal domain 4. To  
464 this end, the corresponding DNA fragments were amplified by PCR using *B. subtilis* strain 168  
465 chromosomal DNA as template and primer pairs ANG2760/ANG2761 (*cdaA<sub>CD</sub>*), ANG2762/ANG2763  
466 (*glmM*) and ANG2762/ANG2764 (*glmM<sub>F369</sub>*). The PCR products were purified, digested with  
467 NheI/BamHI (*cdaA<sub>CD</sub>*) or NcoI/XhoI (*glmM* and *glmM<sub>F369</sub>*) and ligated with pET28b, which had been  
468 cut with the same enzyme. CdaA<sub>CD</sub> was cloned in frame with an N-terminal thrombin cleavable 6-  
469 histidine tag, while GlmM and GlmM<sub>F369</sub> were cloned in frame with a C-terminal 6-histidine tag and a

470 thrombin cleavage site was introduced in front of the His-tag as part of the primer sequence. The  
471 resulting plasmids pET28b-*his-cdaACD*, pET28b-*glmM-his* and pET28b-*glmM<sub>F369</sub>-his* were initially  
472 recovered in *E. coli* XL1-Blue, yielding the strains ANG4583, ANG4584 and ANG4585 and  
473 subsequently transformed for protein expression into strain *E. coli* BL21(DE3), yielding strains  
474 ANG4597, ANG4598 and ANG4599, respectively. Plasmids pET28b-*his-cdaACD-R126*, pET28b-  
475 *glmM-D194A-his*, pET28b-*glmM-D151A/E154A-his* were constructed for the expression of CdaA<sub>CD</sub>  
476 and GlmM alanine substitution variants. The plasmids were constructed by QuikChange mutagenesis  
477 using pET28b-*his-cdaACD* and primer pair ANG3373/ANG3374 or plasmid pET28b-*glmM-his* and  
478 primer pairs ANG3381/ANG3382 and ANG3383/3384, respectively. The plasmids were initially  
479 recovered in *E. coli* XL1-Blue, yielding strains ANG5933, ANG5937, ANG5938 and subsequently  
480 introduced for protein expression into *E. coli* strain BL21(DE3) yielding strains ANG5940, ANG5944,  
481 ANG5945. In addition, plasmid pET28b-*glmM-D151A/E154A/D194A-his* for expression of a GlmM  
482 variant with a triple Asp151 (D151), *Glu154* (E154) and *Asp195* (D195) alanine substitution variant  
483 was constructed by QuikChange mutagenesis using plasmid pET28b-*glmM-D194A-his* as template and  
484 primer pair ANG3383/3384 to introduce the D151A and E154A mutations. Plasmid pET28b-*glmM-*  
485 *D151A/E154A/D194A-his* was recovered in *E. coli* strain XL1-Blue, yielding strain ANG5939 and  
486 subsequently introduced for protein expression into strain BL21(DE3) yielding strain ANG4946. The  
487 sequences of all plasmid inserts were verified by fluorescent automated sequencing at Eurofins.  
488

### 489 **Protein expression, purification and quantification**

490 Proteins CdaA<sub>CD</sub>, GlmM and GlmM<sub>F369</sub> were expressed and purified from 1 L cultures as previously  
491 described (28). Briefly, when bacterial cultures reached an OD<sub>600</sub> of approximately 0.6, protein  
492 expression was induced with 1 mM IPTG (final concentration) for 3 hours at 37°C. Cells were harvested  
493 by centrifugation, suspended in 20 mL of 50 mM Tris pH 7.5, 500 mM NaCl buffered and lysed using  
494 a French Press system. Lysates were clarified by centrifugation and the supernatant loaded onto a gravity  
495 flow column with 3 mL of Ni-NTA resin. Immobilized proteins were washed with 20 mL of 50 mM  
496 Tris pH 7.5, 500 mM NaCl, 50 mM imidazole buffer and eluted in 5 x 1 ml fractions using 50 mM Tris  
497 pH 7.5, 200 mM NaCl, 500 mM imidazole buffer. Fractions containing the proteins were pooled and  
498 loaded onto a preparative Superdex 200 HiLoad 16/60 column equilibrated with 1 column volume of 30  
499 mM Tris pH 7.5, 150 mM NaCl buffer. When appropriate, the purified proteins were concentrated using  
500 10 mL 10 kDa cutoff Amicon concentrators for downstream applications. For the purification of the  
501 CdaA<sub>CD</sub>:GlmM and CdaA<sub>CD</sub>:GlmM<sub>F369</sub> complexes or complexes of CdaA<sub>CD</sub> and GlmM alanine-  
502 substitution variants, cell lysates of strains overproducing the respective proteins were mixed after the  
503 French press step, then the same protein purification procedure steps as described above used for the  
504 purification of individual proteins were performed. Protein concentrations were determined using the  
505 BCA assay kit (Pierce™ BCA Protein Assay Kit). For each sample, the readings were taken in triplicates  
506 and then averaged to obtain the protein concentration. Purified proteins were also separated on 12%  
507 SDS PAGE gels and detected by Coomassie staining.  
508

### 509 **Microscale Thermophoresis**

510 A Microscale Thermophoresis (MST) experiment was performed to determine the binding affinity  
511 between the *B. subtilis* CdaA<sub>CD</sub> and GlmM proteins. The CdaA<sub>CD</sub> and GlmM were expressed and  
512 purified from 1 L cultures as described above, however using 20 mM HEPES, pH 7.5, 500 mM NaCl  
513 buffer for the Ni-NTA purification and 10 mM HEPES, pH 7.5, 150 mM NaCl for the SEC purification  
514 step. Next, CdaA<sub>CD</sub> was fluorescently labelled with an amine-reactive dye using the Monolith Protein  
515 Labelling RED-NHS 2nd Generation kit (NanoTemper Technologies GmbH). To this end, 90 µl of a 40  
516 µM CdaA<sub>CD</sub> solution was mixed with 10 µl of a 400 µM dye solution in 10 mM HEPES, pH 7.5, 150  
517 mM NaCl, 0.05% Tween-20 buffer and incubated for 30 min at room temperature in the dark.  
518 Unincorporated dye was subsequently removed from the labelled protein as described in the  
519 manufacturer's instructions. Following the labelling reaction, the protein concentration was determined  
520 by nanodrop and using the Beer-Lambert equation and an extinction coefficient of 0.774 for CdaA<sub>CD</sub>.  
521 For the MST experiment, a 50 nM solution of the fluorescently labelled CdaA<sub>CD</sub> protein was mixed at a  
522 1:1 ratio with a solution of purified GlmM protein at a starting concentration of 1600 µM and ten 2-fold  
523 dilutions thereof prepared in the purification buffer (10 mM HEPES, pH 7.5, 150 mM NaCl, 0.05%  
524 Tween-20). The samples were filled into individual premium capillaries and subsequently loaded in the

525 capillary tray. Each MST run was performed on a Monolith NT.115 instrument at a light emitting diode  
526 (LED) power of 95% and microscale thermophoresis (MST) power of 80% with a duration of 30 seconds  
527 laser on time (NanoTemper Technologies GmbH) (43). The experiment was performed 5 times and  
528 average normalized fluorescence values and standard deviations determined and plotted. For the data  
529 analysis and  $K_d$  determination the NT Analysis Software (NanoTemper Technologies GmbH) was used  
530 (43).

531

### 532 **Protein crystallisation, data processing and analysis**

533 For crystallisation, the histidine tag was removed from the purified *B. subtilis* CdaA<sub>CD</sub> protein. This was  
534 done by incubating 10 mg purified protein with 20 U thrombin overnight at 4°C with agitation. The  
535 following day, the tag less CdaA<sub>CD</sub> was purified by size-exclusion chromatography as described above.  
536 The CdaA<sub>CD</sub> protein was crystallized at a concentration of 4 mg/ml in 0.1M sodium cacodylate pH 6.5,  
537 0.1M ammonium sulfate, 0.3 M sodium formate, 6% PEG 8000, 3%  $\gamma$ -PGA via the vapour diffusion  
538 method. The crystal screens for *B. subtilis* GlmM (including the His tag) were set up at a concentration  
539 of 10 mg/ml and protein crystals were obtained in two different conditions. The structure with bound  
540 PO<sub>4</sub> (GlmM:PO<sub>4</sub>) was obtained in the Morpheus screen containing 0.1 M buffer system 1 (Imidazole;  
541 MES, pH 6.5), 0.09 M NPS (NaNO<sub>3</sub>; Na<sub>2</sub>HPO<sub>4</sub>; (NH<sub>4</sub>)<sub>2</sub>SO<sub>4</sub>) and 37.5% MPD\_P1K\_P3350 (75% MPD,  
542 PEG 1K, PEG 3350) and the divalent-ion bound crystal structure (GlmM:metal ion) was obtained in  
543 0.05 M Magnesium chloride hexahydrate, 0.1 M HEPES pH 7.5, 30% v/v Polyethylene glycol  
544 monomethyl ether 550 buffer. The crystals for the CdaA<sub>CD</sub>:GlmM<sub>F369</sub> complex were set up at a protein  
545 concentration of 10 mg/ml and crystals were obtained in 0.12 M alcohols, 0.1 M buffer system  
546 (Imidazole; MES, pH 6.5) and 30% GOL\_P4K (60% glycerol, PEG 4K) (Complex 1) and 0.1 M  
547 carboxylic acids, 0.1 M buffer system 1 (Imidazole; MES, pH 6.5) and 30% GOL\_P4K (60% glycerol,  
548 PEG 4K) (Complex 2). The crystals were fished and stored in liquid nitrogen to test for diffraction at  
549 the I03 beamline at the Diamond Light Source (Harwell Campus, Didcot, UK). Data were reduced with  
550 DIALS (44) and scaled and merged with AIMLESS (45). The structures of CdaA<sub>CD</sub> and GlmM were  
551 solved by the molecular replacement method using the program MR-PHASER (46) in the Phenix suite  
552 (47), using the *L. monocytogenes* CdaA structure (PDB 4RV7; (21)) and *B. anthracis* GlmM structure  
553 (PDB 3PDK; (37)) as the search models, respectively. To solve the phase problem for the structure of  
554 the CdaA<sub>CD</sub>:GlmM<sub>F369</sub> complex, dimers of *B. subtilis* CdaA<sub>CD</sub> and GlmM (each) were used as the search  
555 models using the MR-PHASER program in Phenix. The models were manually built using COOT (48)  
556 followed by iterative cycles of structure refinement using the Phenix-Refine program (49). The final  
557 refined structures were analysed using the PDBePISA server (36) to identify buried interface areas for  
558 each protein. To search for conserved residues among the phylogenetically related homologs, a protein  
559 BLAST search was performed using *B. subtilis* CdaA<sub>CD</sub> and GlmM amino acid sequences as query  
560 sequences and a multiple sequence alignment (MSA) of the top 2500 homologs found in Firmicutes was  
561 prepared. The MSA was then used to identify conserved residues among the homologs using the  
562 ConSurf server (50).

563

### 564 **CdaA<sub>CD</sub> activity and inhibition assays**

565 To assess the activity of the *B. subtilis* CdaA<sub>CD</sub> enzymes, 20  $\mu$ l enzyme reactions were set up in 100 mM  
566 NaCl, 40 mM HEPES pH 7 buffer containing 10 mM MnCl<sub>2</sub> (or 10 mM MgCl<sub>2</sub> or 10 mM CoCl<sub>2</sub> for  
567 metal dependent assays), 100 mM ATP spiked with  $\alpha$ -P<sup>32</sup>-labelled ATP (Perkin Elmer; using 0.4  $\mu$ l of  
568 a 3.3  $\mu$ M, 250  $\mu$ Ci solution per 20  $\mu$ l reaction) and 5  $\mu$ M CdaA<sub>CD</sub> enzyme. The mixture was incubated  
569 at 37°C for 4 hours, followed by heat inactivation at 95°C for 5 minutes. After centrifugation for 10  
570 minutes at 21,000 x g, 1  $\mu$ l of the mixture was deposited onto a polyethylenimine-modified cellulose  
571 TLC plate (Millipore) and nucleotides separated by running the plate for 20 minutes using a 3.52 M  
572 (NH<sub>4</sub>)<sub>2</sub>SO<sub>4</sub> and 1.5 M KH<sub>2</sub>PO<sub>4</sub> buffer system mixed at a 1:1.5 v/v ratio. Radioactive signals for ATP and  
573 the c-di-AMP reaction product were detected using a Typhoon FLA-700 phosphor imager. The bands  
574 were quantified using the ImageQuant program and the obtained values used to calculate the percent  
575 conversion of ATP to c-di-AMP. For the time course experiment, a 100  $\mu$ l reaction mixture was prepared  
576 as described above and incubated at 37°C. Ten  $\mu$ l aliquots were removed at the indicated time points  
577 and the enzyme reactions stopped by incubation the removed aliquots at 95°C for 5 minutes. To assess  
578 the activity of CdaA<sub>CD</sub> in the presence of GlmM or GlmM<sub>F369</sub>, the full length GlmM protein or C-  
579 terminally truncated GlmM variant were added to the reaction mixture at a 1:2 (CdaA<sub>CD</sub> : GlmM or

580 CdaA<sub>CD</sub> : GlmM<sub>F369</sub>) molar ratio and the reactions incubated at 37°C for 4 hours, stopped and analysed  
581 as described above. The enzyme activity assays were performed in triplicates with two independently  
582 purified protein preparations.

583

#### 584 SAXS sample preparation and analysis

585 For the SAXS analysis, purified CdaA<sub>CD</sub>, GlmM, CdaA<sub>CD</sub>:GlmM complex and CdaA<sub>CD</sub>:GlmM<sub>F369</sub>  
586 complex protein samples were purified by size exclusion chromatography as described above and  
587 subsequently concentrated to 5 mg/ml for CdaA<sub>CD</sub>, 24 mg/ml each for GlmM and the CdaA<sub>CD</sub>:GlmM  
588 complex and 10 mg/ml for the CdaA<sub>CD</sub>:GlmM<sub>F369</sub> complex. Next, 50 µl protein samples were loaded on  
589 a high pressure Shodex column (KW403: range 10 kDa to 700 kDa) fitted to an Agilent 1200 HPLC  
590 system at the B21 beamline at the Diamond Light Source (Didcot, UK). The size-exclusion column was  
591 equilibrated with 30 mM Tris pH 7.5, 150 mM NaCl buffer prior to loading the protein sample and the  
592 data were collected continuously throughout the protein elution. The analysis of the datasets was done  
593 via ScÅtter (51) using the scattering frames corresponding to the elution peaks. The *ab-initio* analysis  
594 of the SAXS data to reconstruct a low-resolution shape of the model was done using DAMAVER  
595 (DAMMIF) program (52) which performs 13 *ab-initio* runs to generate models from each run that were  
596 averaged to determine the most persistent three-dimensional shape of the protein. The cross-correlation  
597 Normalised Spatial Discrepancy (NSD) values were calculated using DAMAVER (DAMSEL)(52) from  
598 each of the 13 generated models. The mean NSD values calculated for each of the protein were: 0.591  
599 ± 0.088 (CdaA<sub>CD</sub>), 0.598 ± 0.014 (GlmM), 1.201 ± 0.099 (CdaA<sub>CD</sub>:GlmM<sub>F369</sub> complex) and 0.661 ±  
600 0.064 (CdaA<sub>CD</sub>:GlmM complex). The program Chimera (53) was used to visualise the reconstructed  
601 SAXS maps. The crystal structures of CdaA<sub>CD</sub> and GlmM dimers as well as CdaA<sub>CD</sub>:GlmM<sub>F369</sub> complex  
602 were fitted in the respective SAXS envelopes in Chimera using the one-step fit function. For the CdaA<sub>CD</sub>  
603 : GlmM complex data, a structural model of the CdaA<sub>CD</sub> full-length GlmM complex was generated based  
604 on the crystal structure of CdaA<sub>CD</sub> : GlmM<sub>F369</sub> complex, which was then fitted into the SAXS envelope  
605 data using Chimera.

606

#### 607 Data availability

608 The structure coordinates of the *B. subtilis* proteins were deposited in the Protein Database  
609 (<https://www.rcsb.org>), under PDB codes 6HUW (CdaA<sub>CD</sub>), 7OJR (GlmM: PO<sub>4</sub> bound), 7OML (GlmM:  
610 metal bound) and 7OLH (CdaA<sub>CD</sub>:GlmM<sub>F369</sub> Complex 1) and 7OJS (CdaA<sub>CD</sub>:GlmM<sub>F369</sub> Complex 2).  
611 SAXS models were deposited in the SASBDB database, under the accession codes SASDL25 (Complex  
612 CdaA<sub>CD</sub>:GlmM), SASDMQ5 (Complex CdaA<sub>CD</sub>:GlmM<sub>F369</sub>), SASDLZ4 (GlmM) and SASDLY4  
613 (CdaA<sub>CD</sub>).

614

#### 615 Supporting Information

616 This article contains a supporting information file with the following additional references  
617 (36,50,51,54,55).

618

619 **Acknowledgments.** We would like to thank Christiaan van Ooij for helpful comments on the  
620 manuscript.

621

#### 622 Author contribution statement

623 **Monisha Pathania:** Conceptualization, Investigation, Data analysis, Visualization, Writing – original  
624 draft preparation. **Tommaso Tosi:** Conceptualization, Investigation, Data analysis, Writing – review &  
625 editing. **Charlotte Millsership:** Investigation, Data analysis, Writing – review & editing. **Fumiya**  
626 **Hoshiga:** Investigation, Data analysis, Writing – review & editing. **Rhodri M. L. Morgan:** Data  
627 analysis, Supervision, Writing – review & editing. **Paul S. Freemont:** Conceptualization, Funding  
628 acquisition, Supervision, Data analysis, Writing – review & editing. **Angelika Gründling:**  
629 Conceptualization, Funding acquisition, Data analysis, Supervision, Writing – original draft preparation.

630

#### 631 Funding and additional information

632 This work was funded by the MRC grant MR/P011071/1 to AG and PSF and the Wellcome Trust grant  
633 210671/Z/18/Z to AG. The crystallization facility at Imperial College was funded by the BBSRC  
634 (BB/D524840/1) and the Wellcome Trust (202926/Z/16/Z). X-Ray datasets for CdaA<sub>CD</sub>, GlmM and the

635 CdaA<sub>CD</sub>:GlmM complex 2 were collected at the I03 beamline and the CdaA<sub>CD</sub>:GlmM complex 1 dataset  
636 was collected at the I04 beamline at the Diamond Light Source (Didcot, UK). The SAXS data were  
637 collected at the B21 beamline at the Diamond Light Source (Didcot, UK).

638

639 **Conflict of Interest**

640 The authors declare no conflicts of interest in regard to this manuscript.

641

642

643 **References:**

644

- 645 1. Hengge, R., Gründling, A., Jenal, U., Ryan, R., and Yildiz, F. (2016) Bacterial Signal  
646 Transduction by Cyclic Di-GMP and Other Nucleotide Second Messengers. *J Bacteriol* **198**,  
647 15-26
- 648 2. Krasteva, P. V., and Sondermann, H. (2017) Versatile modes of cellular regulation via cyclic  
649 dinucleotides. *Nat Chem Biol* **13**, 350-359
- 650 3. Witte, G., Hartung, S., Buttner, K., and Hopfner, K. P. (2008) Structural biochemistry of a  
651 bacterial checkpoint protein reveals diadenylate cyclase activity regulated by DNA  
652 recombination intermediates. *Mol Cell* **30**, 167-178
- 653 4. Bai, Y., Yang, J., Zarrella, T. M., Zhang, Y., Metzger, D. W., and Bai, G. (2014) Cyclic di-  
654 AMP impairs potassium uptake mediated by a cyclic di-AMP binding protein in *Streptococcus*  
655 *pneumoniae*. *J Bacteriol* **196**, 614-623
- 656 5. Whiteley, A. T., Garelis, N. E., Peterson, B. N., Choi, P. H., Tong, L., Woodward, J. J., and  
657 Portnoy, D. A. (2017) c-di-AMP modulates *Listeria monocytogenes* central metabolism to  
658 regulate growth, antibiotic resistance and osmoregulation. *Mol Microbiol* **104**, 212-233
- 659 6. Huynh, T. N., Choi, P. H., Sureka, K., Ledvina, H. E., Campillo, J., Tong, L., and Woodward,  
660 J. J. (2016) Cyclic di-AMP targets the cystathionine beta-synthase domain of the osmolyte  
661 transporter OpuC. *Mol Microbiol* **102**, 233-243
- 662 7. Corrigan, R. M., Campeotto, I., Jeganathan, T., Roelofs, K. G., Lee, V. T., and Gründling, A.  
663 (2013) Systematic identification of conserved bacterial c-di-AMP receptor proteins. *Proc Natl*  
664 *Acad Sci U S A* **110**, 9084-9089
- 665 8. Gundlach, J., Herzberg, C., Kaefer, V., Gunka, K., Hoffmann, T., Weiss, M., Gibhardt, J.,  
666 Thurmer, A., Hertel, D., Daniel, R., Bremer, E., Commichau, F. M., and Stülke, J. (2017)  
667 Control of potassium homeostasis is an essential function of the second messenger cyclic di-  
668 AMP in *Bacillus subtilis*. *Sci Signal* **10**
- 669 9. Corrigan, R. M., Abbott, J. C., Burhenne, H., Kaefer, V., and Gründling, A. (2011) c-di-AMP  
670 is a new second messenger in *Staphylococcus aureus* with a role in controlling cell size and  
671 envelope stress. *PLoS Pathog* **7**, e1002217
- 672 10. Luo, Y., and Helmann, J. D. (2012) Analysis of the role of *Bacillus subtilis* sigma(M) in beta-  
673 lactam resistance reveals an essential role for c-di-AMP in peptidoglycan homeostasis. *Mol*  
674 *Microbiol* **83**, 623-639
- 675 11. Corrigan, R. M., Bowman, L., Willis, A. R., Kaefer, V., and Gründling, A. (2015) Cross-talk  
676 between two nucleotide-signaling pathways in *Staphylococcus aureus*. *J Biol Chem* **290**, 5826-  
677 5839
- 678 12. Dengler, V., McCallum, N., Kiefer, P., Christen, P., Patrignani, A., Vorholt, J. A., Berger-Bächi,  
679 B., and Senn, M. M. (2013) Mutation in the c-di-AMP cyclase *dacA* affects fitness and  
680 resistance of methicillin resistant *Staphylococcus aureus*. *PLoS One* **8**, e73512
- 681 13. Woodward, J. J., Iavarone, A. T., and Portnoy, D. A. (2010) c-di-AMP secreted by intracellular  
682 *Listeria monocytogenes* activates a host type I interferon response. *Science* **328**, 1703-1705
- 683 14. Witte, C. E., Whiteley, A. T., Burke, T. P., Sauer, J. D., Portnoy, D. A., and Woodward, J. J.  
684 (2013) Cyclic di-AMP is critical for *Listeria monocytogenes* growth, cell wall homeostasis, and  
685 establishment of infection. *mBio* **4**, e00282-00213
- 686 15. Oppenheimer-Shaanan, Y., Wexselblatt, E., Katzhendler, J., Yavin, E., and Ben-Yehuda, S.  
687 (2011) c-di-AMP reports DNA integrity during sporulation in *Bacillus subtilis*. *EMBO Rep* **12**,  
688 594-601
- 689 16. Devaux, L., Sleiman, D., Mazzuoli, M. V., Gominet, M., Lanotte, P., Trieu-Cuot, P., Kaminski,  
690 P. A., and Firon, A. (2018) Cyclic di-AMP regulation of osmotic homeostasis is essential in  
691 Group B *Streptococcus*. *PLoS Genet* **14**, e1007342
- 692 17. Mehne, F. M., Gunka, K., Eilers, H., Herzberg, C., Kaefer, V., and Stülke, J. (2013) Cyclic di-  
693 AMP homeostasis in *Bacillus subtilis*: both lack and high level accumulation of the nucleotide  
694 are detrimental for cell growth. *J Biol Chem* **288**, 2004-2017
- 695 18. Commichau, F. M., Heidemann, J. L., Ficner, R., and Stülke, J. (2019) Making and Breaking of  
696 an Essential Poison: the Cyclases and Phosphodiesterases That Produce and Degrade the  
697 Essential Second Messenger Cyclic di-AMP in Bacteria. *J Bacteriol* **201**

- 698 19. Rao, F., See, R. Y., Zhang, D., Toh, D. C., Ji, Q., and Liang, Z. X. (2010) YybT is a signaling  
699 protein that contains a cyclic dinucleotide phosphodiesterase domain and a GGDEF domain  
700 with ATPase activity. *J Biol Chem* **285**, 473-482
- 701 20. Huynh, T. N., Luo, S., Pensinger, D., Sauer, J. D., Tong, L., and Woodward, J. J. (2015) An  
702 HD-domain phosphodiesterase mediates cooperative hydrolysis of c-di-AMP to affect bacterial  
703 growth and virulence. *Proc Natl Acad Sci U S A* **112**, E747-756
- 704 21. Rosenberg, J., Dickmanns, A., Neumann, P., Gunka, K., Arens, J., Kaefer, V., Stülke, J., Ficner,  
705 R., and Commichau, F. M. (2015) Structural and biochemical analysis of the essential  
706 diadenylate cyclase CdaA from *Listeria monocytogenes*. *J Biol Chem* **290**, 6596-6606
- 707 22. Zheng, C., Ma, Y., Wang, X., Xie, Y., Ali, M. K., and He, J. (2015) Functional analysis of the  
708 sporulation-specific diadenylate cyclase CdaS in *Bacillus thuringiensis*. *Front Microbiol* **6**, 908
- 709 23. Müller, M., Deimling, T., Hopfner, K. P., and Witte, G. (2015) Structural analysis of the  
710 diadenylate cyclase reaction of DNA-integrity scanning protein A (DisA) and its inhibition by  
711 3'-dATP. *Biochem J* **469**, 367-374
- 712 24. Mehne, F. M., Schroder-Tittmann, K., Eijlander, R. T., Herzberg, C., Hewitt, L., Kaefer, V.,  
713 Lewis, R. J., Kuipers, O. P., Tittmann, K., and Stülke, J. (2014) Control of the diadenylate  
714 cyclase CdaS in *Bacillus subtilis*: an autoinhibitory domain limits cyclic di-AMP production. *J*  
715 *Biol Chem* **289**, 21098-21107
- 716 25. Fahmi, T., Port, G. C., and Cho, K. H. (2017) c-di-AMP: An Essential Molecule in the Signaling  
717 Pathways that Regulate the Viability and Virulence of Gram-Positive Bacteria. *Genes (Basel)* **8**
- 718 26. Corrigan, R. M., and Gründling, A. (2013) Cyclic di-AMP: another second messenger enters  
719 the fray. *Nat Rev Microbiol* **11**, 513-524
- 720 27. Torres, R., Carrasco, B., Gandara, C., Baidya, A. K., Ben-Yehuda, S., and Alonso, J. C. (2019)  
721 *Bacillus subtilis* DisA regulates RecA-mediated DNA strand exchange. *Nucleic Acids Res* **47**,  
722 5141-5154
- 723 28. Tosi, T., Hoshiga, F., Millership, C., Singh, R., Eldrid, C., Patin, D., Mengin-Lecreulx, D.,  
724 Thalassinos, K., Freemont, P., and Gründling, A. (2019) Inhibition of the *Staphylococcus*  
725 *aureus* c-di-AMP cyclase DacA by direct interaction with the phosphoglucosamine mutase  
726 GlmM. *PLoS Pathog* **15**, e1007537
- 727 29. Gundlach, J., Mehne, F. M., Herzberg, C., Kampf, J., Valerius, O., Kaefer, V., and Stülke, J.  
728 (2015) An essential poison: Synthesis and degradation of cyclic di-AMP in *Bacillus subtilis*. *J*  
729 *Bacteriol* **197**, 3265-3274
- 730 30. Heidemann, J. L., Neumann, P., Dickmanns, A., and Ficner, R. (2019) Crystal structures of the  
731 c-di-AMP-synthesizing enzyme CdaA. *J Biol Chem* **294**, 10463-10470
- 732 31. Zhu, Y., Pham, T. H., Nhiep, T. H., Vu, N. M., Marcellin, E., Chakraborti, A., Wang, Y.,  
733 Waanders, J., Lo, R., Huston, W. M., Bansal, N., Nielsen, L. K., Liang, Z. X., and Turner, M.  
734 S. (2016) Cyclic-di-AMP synthesis by the diadenylate cyclase CdaA is modulated by the  
735 peptidoglycan biosynthesis enzyme GlmM in *Lactococcus lactis*. *Mol Microbiol* **99**, 1015-1027
- 736 32. Pham, T. H., Liang, Z. X., Marcellin, E., and Turner, M. S. (2016) Replenishing the cyclic-di-  
737 AMP pool: regulation of diadenylate cyclase activity in bacteria. *Curr Genet* **62**, 731-738
- 738 33. Gibhardt, J., Heidemann, J. L., Bremenkamp, R., Rosenberg, J., Seifert, R., Kaefer, V., Ficner,  
739 R., and Commichau, F. M. (2020) An extracytoplasmic protein and a moonlighting enzyme  
740 modulate synthesis of c-di-AMP in *Listeria monocytogenes*. *Environ Microbiol* **22**, 2771-2791
- 741 34. Rismondo, J., Gibhardt, J., Rosenberg, J., Kaefer, V., Halbedel, S., and Commichau, F. M.  
742 (2016) Phenotypes Associated with the Essential Diadenylate Cyclase CdaA and Its Potential  
743 Regulator CdaR in the Human Pathogen *Listeria monocytogenes*. *J Bacteriol* **198**, 416-426
- 744 35. Barreteau, H., Kovac, A., Boniface, A., Sova, M., Gobec, S., and Blanot, D. (2008) Cytoplasmic  
745 steps of peptidoglycan biosynthesis. *FEMS Microbiol Rev* **32**, 168-207
- 746 36. Krissinel, E., and Henrick, K. (2007) Inference of macromolecular assemblies from crystalline  
747 state. *J Mol Biol* **372**, 774-797
- 748 37. Mehra-Chaudhary, R., Mick, J., and Beamer, L. J. (2011) Crystal structure of *Bacillus anthracis*  
749 phosphoglucosamine mutase, an enzyme in the peptidoglycan biosynthetic pathway. *J Bacteriol*  
750 **193**, 4081-4087

- 751 38. Zheng, H., Cooper, D. R., Porebski, P. J., Shabalina, I. G., Handing, K. B., and Minor, W. (2017)  
752 CheckMyMetal: a macromolecular metal-binding validation tool. *Acta Crystallogr D Struct*  
753 *Biol* **73**, 223-233
- 754 39. Celniker, G., Nimrod, G., Ashkenazy, H., Glaser, F., Martz, E., Mayrose, I., Pupko, T., and  
755 Ben-Tal, N. (2013) ConSurf: Using Evolutionary Data to Raise Testable Hypotheses about  
756 Protein Function. *Isr J Chem* **53**, 199-206
- 757 40. Tan, E., Rao, F., Pasunooti, S., Pham, T. H., Soehano, I., Turner, M. S., Liew, C. W., Lescar,  
758 J., Pervushin, K., and Liang, Z. X. (2013) Solution structure of the PAS domain of a  
759 thermophilic YybT protein homolog reveals a potential ligand-binding site. *J Biol Chem* **288**,  
760 11949-11959
- 761 41. Rao, F., Ji, Q., Soehano, I., and Liang, Z. X. (2011) Unusual heme-binding PAS domain from  
762 YybT family proteins. *J Bacteriol* **193**, 1543-1551
- 763 42. Raguse, M., Torres, R., Seco, E. M., Gandara, C., Ayora, S., Moeller, R., and Alonso, J. C.  
764 (2017) *Bacillus subtilis* DisA helps to circumvent replicative stress during spore revival. *DNA*  
765 *Repair (Amst)* **59**, 57-68
- 766 43. Jerabek-Willemsen, M., André, T., Wanner, R., Roth, H. M., Duhr, S., Baaske, P., and  
767 Breitsprecher, D. (2014) MicroScale Thermophoresis: Interaction analysis and beyond. *Journal*  
768 *of Molecular Structure* **1077**, 101-113
- 769 44. Winter, G., Waterman, D. G., Parkhurst, J. M., Brewster, A. S., Gildea, R. J., Gerstel, M.,  
770 Fuentes-Montero, L., Vollmar, M., Michels-Clark, T., Young, I. D., Sauter, N. K., and Evans,  
771 G. (2018) DIALS: implementation and evaluation of a new integration package. *Acta*  
772 *Crystallogr D Struct Biol* **74**, 85-97
- 773 45. Evans, P. R., and Murshudov, G. N. (2013) How good are my data and what is the resolution?  
774 *Acta Crystallogr D* **69**, 1204-1214
- 775 46. Bunkoczi, G., Echols, N., McCoy, A. J., Oeffner, R. D., Adams, P. D., and Read, R. J. (2013)  
776 Phaser.MRage: automated molecular replacement. *Acta Crystallogr D Biol Crystallogr* **69**,  
777 2276-2286
- 778 47. Liebschner, D., Afonine, P. V., Baker, M. L., Bunkoczi, G., Chen, V. B., Croll, T. I., Hintze,  
779 B., Hung, L. W., Jain, S., McCoy, A. J., Moriarty, N. W., Oeffner, R. D., Poon, B. K., Prisant,  
780 M. G., Read, R. J., Richardson, J. S., Richardson, D. C., Sammito, M. D., Sobolev, O. V.,  
781 Stockwell, D. H., Terwilliger, T. C., Urzhumtsev, A. G., Videau, L. L., Williams, C. J., and  
782 Adams, P. D. (2019) Macromolecular structure determination using X-rays, neutrons and  
783 electrons: recent developments in Phenix. *Acta Crystallogr D Struct Biol* **75**, 861-877
- 784 48. Emsley, P., Lohkamp, B., Scott, W. G., and Cowtan, K. (2010) Features and development of  
785 Coot. *Acta Crystallogr D Biol Crystallogr* **66**, 486-501
- 786 49. Headd, J. J., Echols, N., Afonine, P. V., Grosse-Kunstleve, R. W., Chen, V. B., Moriarty, N.  
787 W., Richardson, D. C., Richardson, J. S., and Adams, P. D. (2012) Use of knowledge-based  
788 restraints in phenix.refine to improve macromolecular refinement at low resolution. *Acta*  
789 *Crystallogr D Biol Crystallogr* **68**, 381-390
- 790 50. Ashkenazy, H., Abadi, S., Martz, E., Chay, O., Mayrose, I., Pupko, T., and Ben-Tal, N. (2016)  
791 ConSurf 2016: an improved methodology to estimate and visualize evolutionary conservation  
792 in macromolecules. *Nucleic Acids Research* **44**, W344-W350
- 793 51. Förster, S., Apostol, L., and Bras, W. (2010) Scatter: software for the analysis of nano- and  
794 mesoscale small-angle scattering. *Journal of Applied Crystallography* **43**, 639-646
- 795 52. Franke, D., and Svergun, D. I. (2009) DAMMIF, a program for rapid ab-initio shape  
796 determination in small-angle scattering. *J Appl Crystallogr* **42**, 342-346
- 797 53. Pettersen, E. F., Goddard, T. D., Huang, C. C., Couch, G. S., Greenblatt, D. M., Meng, E. C.,  
798 and Ferrin, T. E. (2004) UCSF Chimera--a visualization system for exploratory research and  
799 analysis. *J Comput Chem* **25**, 1605-1612
- 800 54. Burkholder, P. R., and Giles, N. H., Jr. (1947) Induced biochemical mutations in *Bacillus*  
801 *subtilis*. *Am J Bot* **34**, 345-348
- 802 55. Laskowski, R. A., and Swindells, M. B. (2011) LigPlot+: multiple ligand-protein interaction  
803 diagrams for drug discovery. *J Chem Inf Model* **51**, 2778-2786  
804  
805



806 **Tables**

807 **Table 1:** Crystallographic data and refinement statistics

|                                                                      | CdaACD                            | GlmM<br>(PO <sub>4</sub> bound) | GlmM<br>(metal bound) | CdaACD and<br>GlmM <sub>F369</sub><br>Complex 1 | CdaACD and<br>GlmM <sub>F369</sub><br>Complex 2 |
|----------------------------------------------------------------------|-----------------------------------|---------------------------------|-----------------------|-------------------------------------------------|-------------------------------------------------|
| <b>Data collection</b>                                               |                                   |                                 |                       |                                                 |                                                 |
| Space group                                                          | P 4 <sub>3</sub> 2 <sub>1</sub> 2 | P 3 <sub>2</sub> 2 1            | P 3 <sub>2</sub> 2 1  | P 1 2 <sub>1</sub> 1                            | P 1 2 <sub>1</sub> 1                            |
| Cell dimensions                                                      |                                   |                                 |                       |                                                 |                                                 |
| <i>a,b,c</i> (Å)                                                     | 62.88, 62.88, 187.32              | 134.87, 134.87, 69.18           | 134.41, 134.41, 69.01 | 62.20, 227.56, 151.60                           | 62.80, 228.53, 153.19                           |
| $\alpha,\beta,\gamma$ (°)                                            | 90.00, 90.00, 90.00               | 90.00, 90.00, 120.00            | 90.00, 90.00, 120.00  | 90.00, 99.66, 90.00                             | 90.00, 99.86, 90.00                             |
| Resolution (Å)                                                       | 93.66 (2.8)*                      | 48.290 (3.0)*                   | 48.15 (2.9)*          | 61.32 (3.65)*                                   | 76.18 (4.2)*                                    |
| Unique reflections                                                   | 9974 (1396)*                      | 14081 (2497)*                   | 15955 (2503)*         | 45925 (4441)*                                   | 31005 (4490)*                                   |
| <i>R</i> <sub>pim</sub>                                              | 0.05 (0.52)*                      | 0.13 (2.58)*                    | 0.09 (1.46)*          | 0.019 (0.15)*                                   | 0.06 (0.22)*                                    |
| CC(1/2)                                                              | 0.99 (0.97)*                      | 0.54 (0.54)*                    | 0.99 (0.39)*          | 0.99 (0.53)*                                    | 0.78 (0.39)*                                    |
| <i>I</i> / $\sigma$ ( <i>I</i> )                                     | 18.2 (5.9)*                       | 6.9 (2.4)*                      | 12.6 (4.4)*           | 5.5 (1.2)*                                      | 2.1 (0.9)*                                      |
| Completeness (%)                                                     | 100.0 (100.0)*                    | 99.9 (99.5)*                    | 98.8 (97.3)*          | 99.6 (99.2)*                                    | 99.9 (99.9)*                                    |
| Redundancy                                                           | 23.2 (24.1)*                      | 19.6 (17.3)*                    | 20.2 (17.5)*          | 6.9 (7.1)                                       | 3.8 (3.8)*                                      |
| <b>Refinement</b>                                                    |                                   |                                 |                       |                                                 |                                                 |
| Resolution (Å)                                                       | 2.8                               | 3.0                             | 2.9                   | 3.6                                             | 4.2                                             |
| <i>R</i> <sub>work</sub> / <i>R</i> <sub>free</sub> (%) <sup>a</sup> | 0.2545/ 0.2966                    | 0.1996/ 0.2589                  | 0.1868/ 0.2348        | 0.2418/0.2615                                   | 0.2473/ 0.2976                                  |
| <b>Rms deviations</b>                                                |                                   |                                 |                       |                                                 |                                                 |
| Bond lengths (Å)                                                     | 0.008                             | 0.016                           | 0.0015                | 0.003                                           | 0.003                                           |
| Bond angles (°)                                                      | 1.192                             | 1.533                           | 1.396                 | 0.658                                           | 0.703                                           |
| <b>Ramachandran plot (%)</b> Most favoured/ outliers                 |                                   |                                 |                       |                                                 |                                                 |
|                                                                      | 89.82/ 2.11                       | 95.71/ 0.68                     | 87.36/ 1.81           | 92.49/1.44                                      | 92.94/ 0.88                                     |
| <b>PDB code</b>                                                      | 6HUW                              | 7OJR                            | 7OML                  | 7OLH                                            | 7OJS                                            |

808 \* refers to the highest resolution shell

809 <sup>a</sup>*R*<sub>free</sub> was computed same as *R*<sub>work</sub>, using a test set (~5%) of randomly selected reflections that  
810 were omitted from the refinement

811

812

813 **Figures and Figure Legends**

814

815

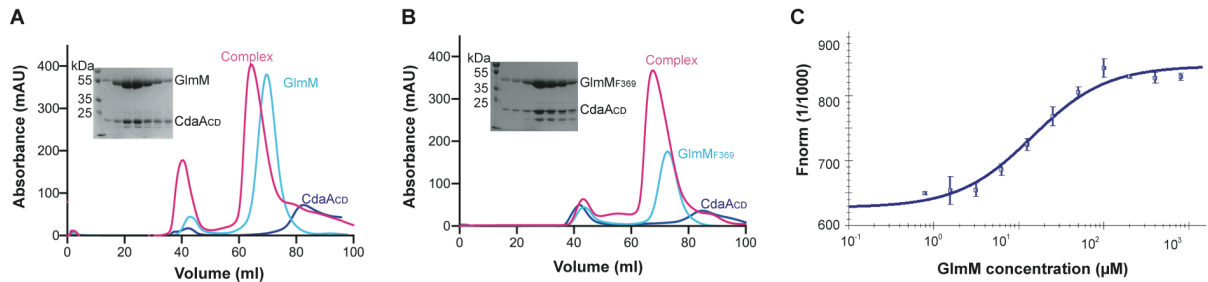

816

817

818 **Figure 1: The *B. subtilis* GlmM and CdaACD proteins form a complex *in vitro*.** *A*, FPLC  
819 chromatograms and SDS-PAGE gel analysis of the *B. subtilis* CdaACD and GlmM complex. The *B.*  
820 *subtilis* proteins CdaACD, GlmM and the CdaACD/GlmM complex were purified by Ni-affinity  
821 chromatography and size-exclusion chromatography. The FPLC elution profiles, recorded at a  
822 wavelength of 280 nm, are shown for CdaACD (blue), GlmM (cyan) and the CdaACD/GlmM complex  
823 (pink). Proteins from the peak fractions of the CdaACD-GlmM complex were separated on a 12% SDS  
824 PAGE gel and proteins visualized by Coomassie staining (shown in the insert). *B*, FPLC chromatograms  
825 and SDS-PAGE gel analysis of the *B. subtilis* CdaACD and GlmM<sub>F369</sub> complex. Same as in (*A*) but using  
826 the C-terminally truncated GlmM<sub>F369</sub> variant in place of the full-length GlmM protein. The experiments  
827 were performed in triplicates and representative chromatograms and gel images are shown. *C*, MST  
828 experiment to determine the binding affinity between CdaACD and GlmM. Increasing concentrations of  
829 GlmM were mixed with fluorescently labelled CdaACD resulted in a gradual change in thermophoresis  
830 and fluorescence readings. The normalized fluorescence values multiplied by a factor of 1000 F<sub>norm</sub>  
831 (1/1000) were plotted using the NT Analysis Software (NanoTemper Technologies GmbH) to yield the  
832 binding curve. The data points are the average values and standard deviations from five independent  
833 MST runs. The K<sub>d</sub> was determined from these data using the NT Analysis Software (NanoTemper  
834 Technologies GmbH).

835

836

837

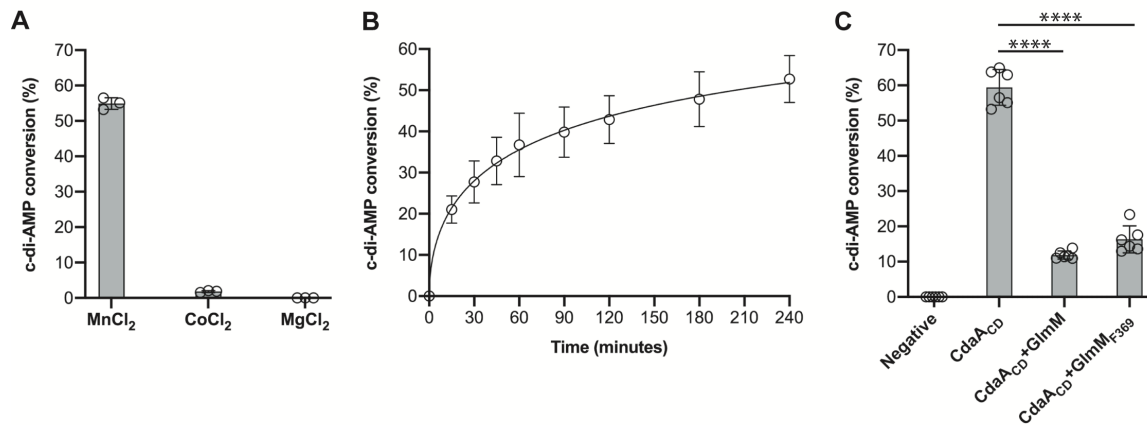

838

839

840 **Figure 2: Enzymatic activity of the *B. subtilis* CdaA<sub>CD</sub> enzyme is inhibited by GlmM or GlmM<sub>F369</sub>.**

841 *A*, Metal-dependency of the *B. subtilis* CdaA<sub>CD</sub> enzyme. The metal-dependency of the *B. subtilis*

842 CdaA<sub>CD</sub> was assessed by performing enzyme reactions using 5 μM of purified CdaA<sub>CD</sub> in buffer

843 containing 1 mM Mn<sup>+2</sup>, Mg<sup>+2</sup> or Co<sup>+2</sup> ions. After 4 h of incubation, the reactions were stopped, separated

844 by TLC and the percentage conversion of radiolabelled ATP to c-di-AMP determined. The average

845 values and standard deviations (SDs) from three experiments were plotted. *B*, CdaA<sub>CD</sub> activity time-

846 course experiment. Enzyme reactions were set up with the *B. subtilis* CdaA<sub>CD</sub> enzyme in buffer

847 containing 1 mM Mn<sup>+2</sup>, aliquots removed, and reactions stopped at the indicated time points and

848 separated by TLC. The percentage conversion of radiolabelled ATP to c-di-AMP was determined and

849 the average values and SDs from three independent experiments plotted. *C*, Enzyme activity of the *B.*

850 *subtilis* CdaA<sub>CD</sub> enzyme in the presence of *B. subtilis* GlmM. The enzyme activity of CdaA<sub>CD</sub> was

851 measured in the absence or presence of GlmM or GlmM<sub>F369</sub> at a molar ratio of 2:1 GlmM or GlmM<sub>F369</sub>

852 to CdaA<sub>CD</sub>. After 4 h of incubation, the reactions were stopped, separated by TLC and the percentage

853 conversion of radiolabelled ATP to c-di-AMP was determined. The average values and SDs from six

854 independent experiments plotted. One-way ANOVA tests followed by Dunnett's multiple comparison

855 were performed to identify statistically significant differences in cyclase activity in the absence or

856 presence of GlmM or GlmM<sub>F369</sub>. \*\*\* indicates p<0.0001.

857

858

859

860

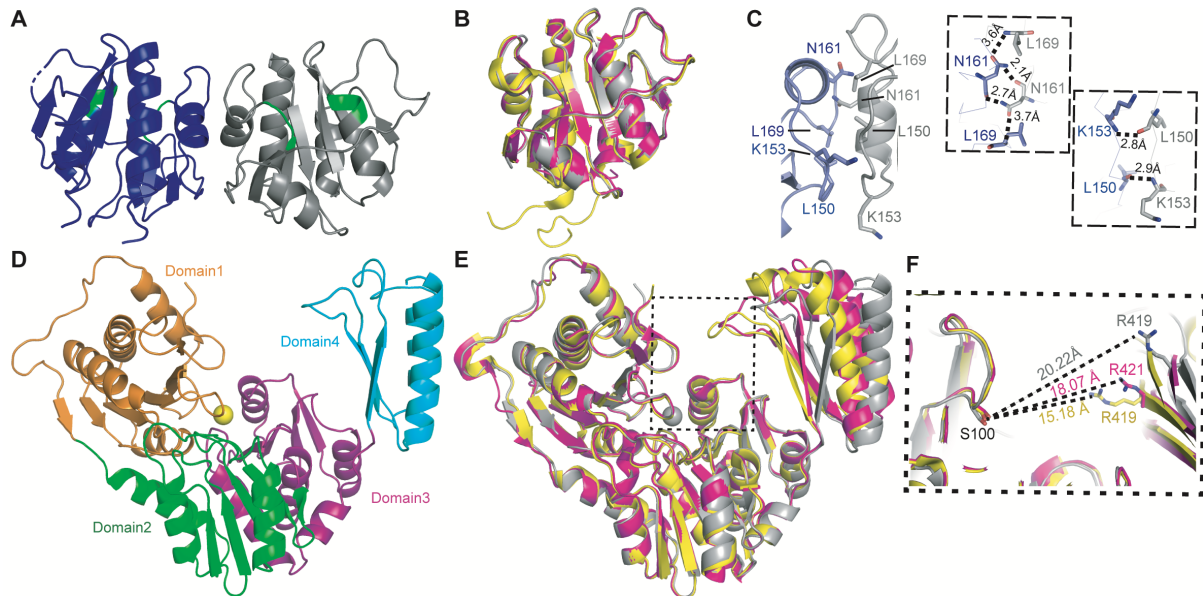

861

862

863

864

865

866

867

868

869

870

871

872

873

874

875

876

877

878

879

880

881

882

**Figure 3: Crystal structures of the *B. subtilis* CdaACD and GlmM enzymes.** *A*, *B. subtilis* CdaACD structure in cartoon representation. The CdaACD protein crystallized as dimer and individual CdaACD monomers are shown in blue and grey, with active site DGA and RHR motifs highlighted in green. *B*, Superimposition of the *B. subtilis*, *L. monocytogenes* and *S. aureus* CdaACD (DacACD) structures. Monomers of the *B. subtilis* CdaACD (grey), *L. monocytogenes* CdaACD (yellow; PDB ID 4RV7) and *S. aureus* DacACD (pink; PDB ID 6GYW) protein structures were superimposed using COOT (48). *C*, CdaACD dimer interface and zoomed in view showing residues Leu150, Lys153, Asn161 and Leu169, which form hydrogen-bonds, in stick representation. *D*, *B. subtilis* GlmM structure in cartoon representation. The GlmM protein crystallized as a dimer (Fig. S2) with one monomer in the asymmetric unit. The GlmM monomer displayed the typical 4 domain architecture, and the individual domains are represented in different colours. A metal-ion was bound to the protein and is shown as yellow sphere. *E*, Superposition of the *B. subtilis*, *S. aureus* and *B. anthracis* GlmM structures. *B. subtilis* GlmM (grey), *B. anthracis* GlmM (yellow; PDB 3PDK) and *S. aureus* GlmM (pink; PDB 6GYX) monomer structures were superimposed using COOT (48). *F*, Zoomed in view of the superimposed *B. subtilis* (grey; metal-ion bound structure), *S. aureus* (pink) and *B. anthracis* (yellow) GlmM structures showing the distances between the indicated Arg residue within the phosphate binding site and the active site Ser residue. Images were generated using PyMOL (The PyMOL Molecular Graphics System, Version 2.0 Schrödinger, LLC).

883

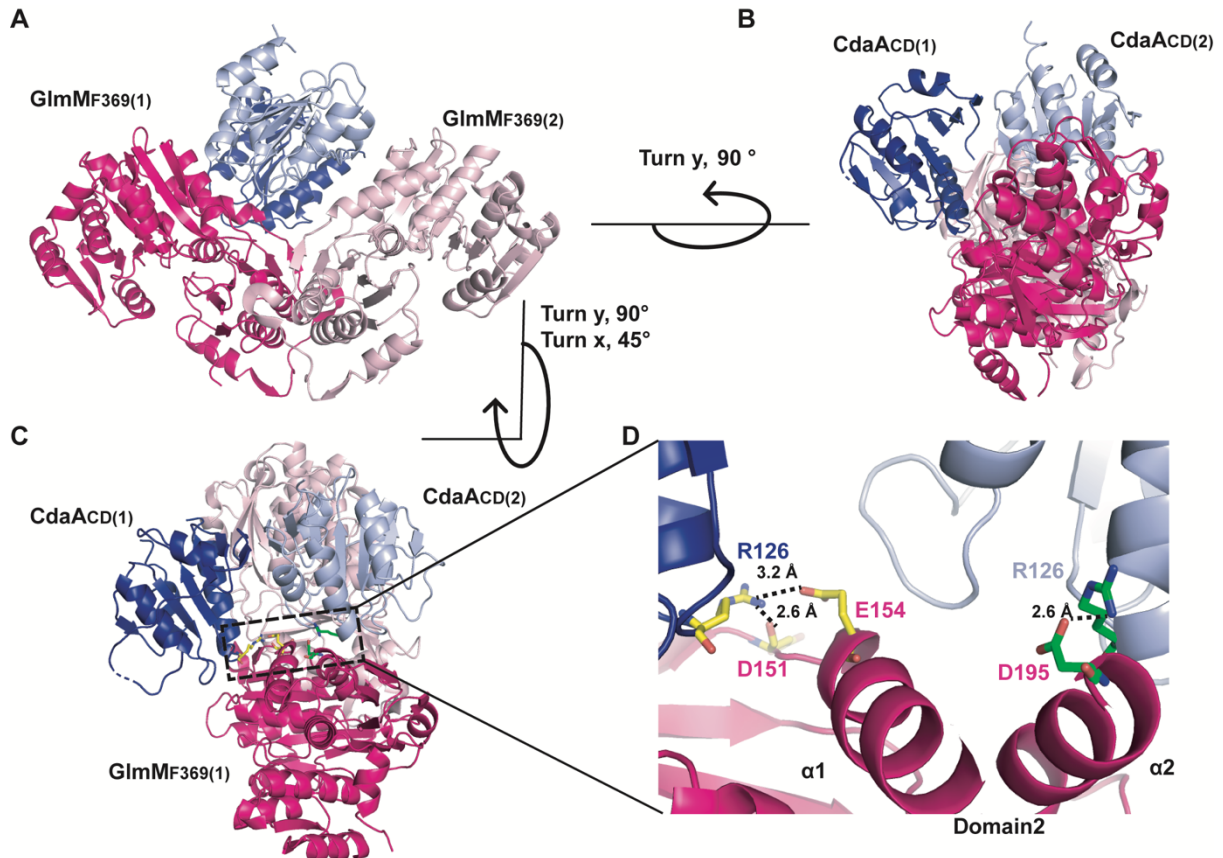

884

885

886 **Figure 4: Crystal structure of the *B. subtilis* CdaACD:GlmMF<sub>369</sub> complex 1.** (A-D) Structure of the

887 *B. subtilis* CdaACD:GlmMF<sub>369</sub> complex 1 shown in cartoon representation. The *B. subtilis*

888 CdaACD:GlmMF<sub>369</sub> complex crystallized as a dimer of dimers with individual GlmMF<sub>369</sub> monomers

889 shown in dark pink [GlmMF<sub>369</sub>(1)] and light pink [GlmMF<sub>369</sub>(2)] and individual CdaACD monomers

890 shown in dark blue [CdaACD(1)] and light blue [CdaACD(2)], respectively. The complex is shown in A, in

891 front view, B, in side view (rotated 90° along the y-axis) and C, in top-side view rotated at the angle as

892 indicated with respect to (A). D, a zoom in view of the CdaACD/GlmMF<sub>369</sub> interface is shown. Residue

893 Arg126 from CdaACD(1) forms H-bond and ionic interactions with Asp 151 and Glu154 of GlmMF<sub>369</sub>(1)

894 (residues shown in yellow), and residue Arg126 from CdaACD(2) forms ionic interactions with Asp195

895 in GlmMF<sub>369</sub>(1) (residues shown in green). The images were prepared in PyMOL (The PyMOL

896 Molecular Graphics System, Version 2.0 Schrödinger, LLC).

897

898

899

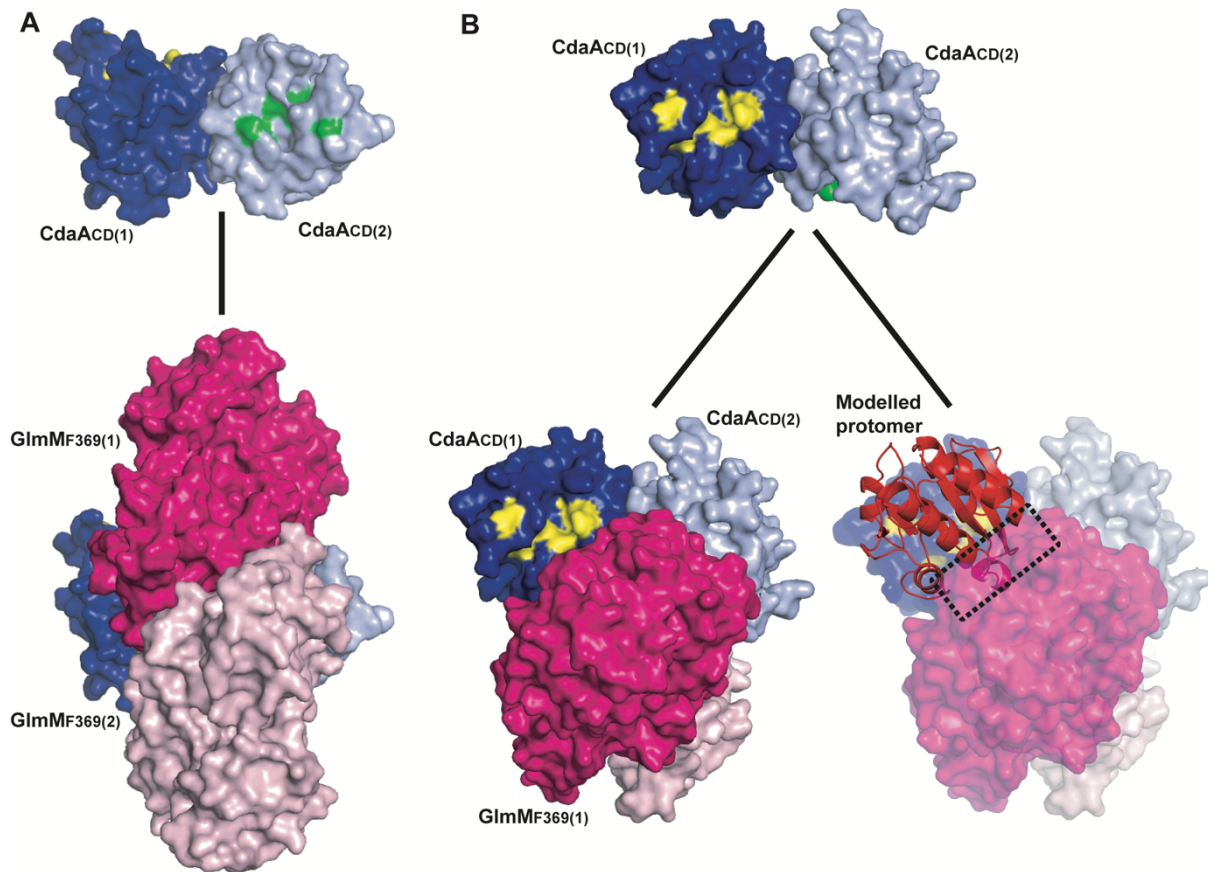

900  
901  
902  
903  
904  
905  
906  
907  
908  
909  
910  
911  
912  
913  
914

**Figure 5: Formation of an active CdaA<sub>CD</sub> dimer is blocked in the complex.** (A-B) Structure of the *B. subtilis* CdaA<sub>CD</sub> dimer from complex 1 (top panels) and the complete CdaA<sub>CD</sub>:GlmM<sub>F369</sub> complex 1 (bottom panels) shown as space filling models. The active site DGA and RHR motifs in CdaA<sub>CD</sub>(1) (dark blue protomer) are shown in yellow and in CdaA<sub>CD</sub>(2) (light blue protomer) in green. *A*, Bottom panel, complex model showing that the active site (green residues) in CdaA<sub>CD</sub>(2) (light blue protomer) are completely occluded in the complex and *B*, the active site (yellow residues) of CdaA<sub>CD</sub>(1) (dark blue protomer) remains partially exposed. However, the modelling of another CdaA<sub>CD</sub> protomer (in red) that forms an active dimer with CdaA<sub>CD</sub>(1) (dark blue protomer) results in protein-protein clashes with the GlmM<sub>F369</sub>(1) monomer in the complex. The active CdaA<sub>CD</sub> dimer was modelled based on the *L. monocytogenes* Δ100CdaA (PDB 6HVL) structure (30).

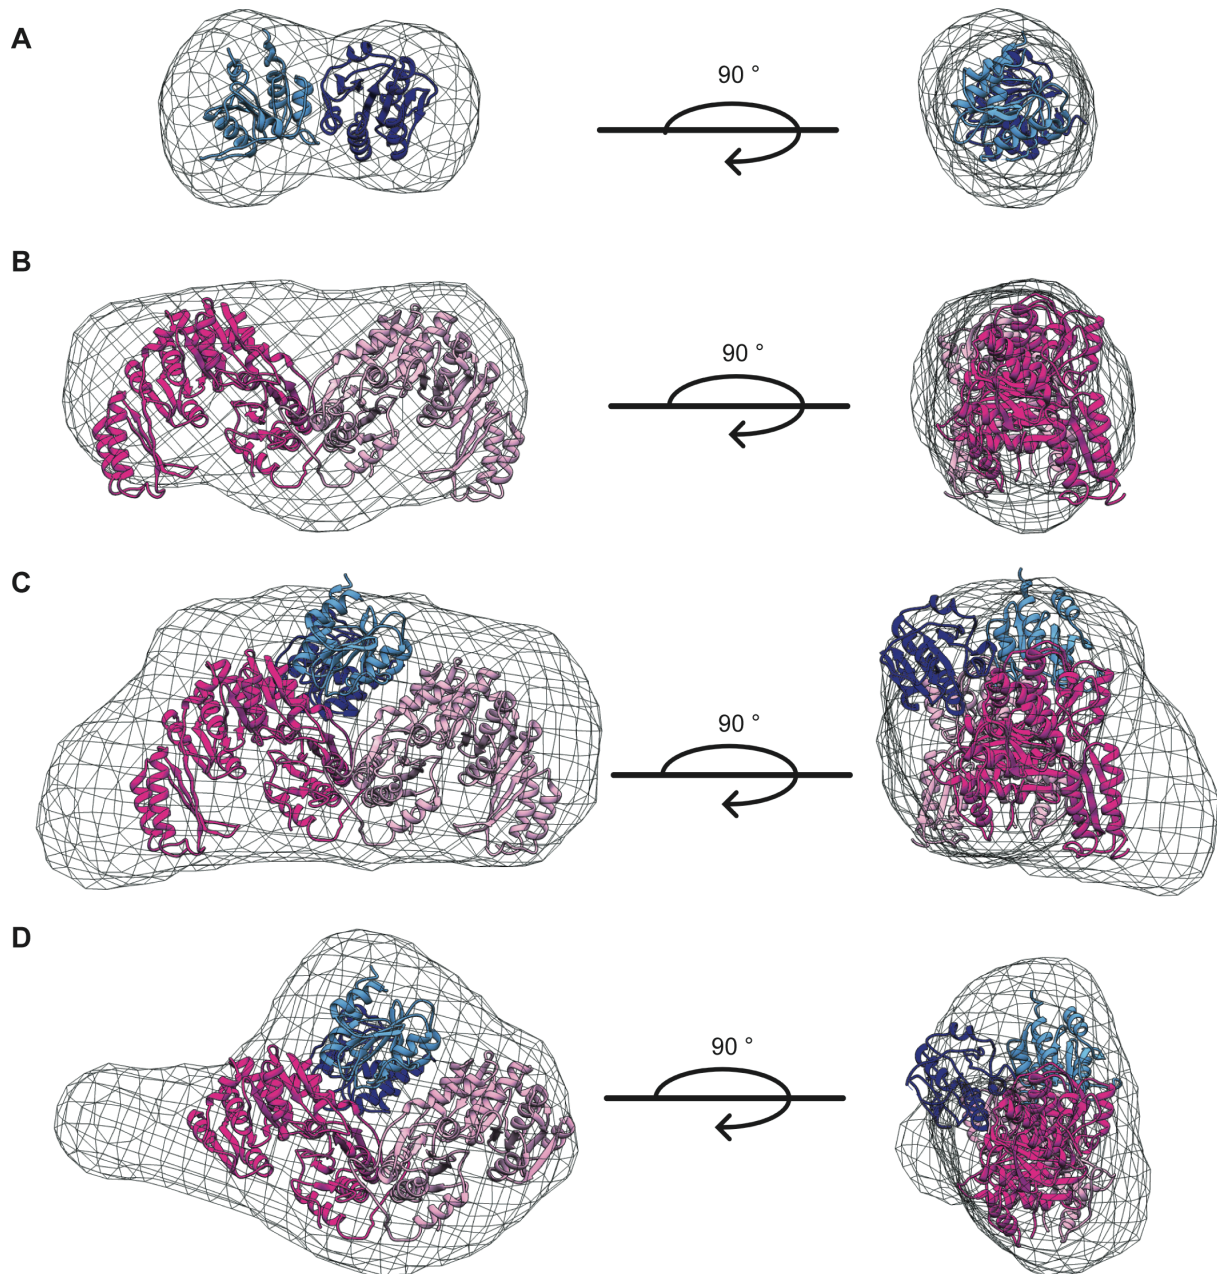

915  
916  
917  
918  
919  
920  
921  
922  
923  
924  
925  
926  
927  
928  
929  
930

**Figure 6: Small Angle X-ray Scattering (SAXS) data of the *B. subtilis* CdaA<sub>CD</sub>, GlmM proteins and the CdaA<sub>CD</sub>:GlmM and CdaA<sub>CD</sub>:GlmM<sub>F369</sub> complexes.** *A-D*, SAXS envelopes with fitted protein structures. For the SAXS experiment, 50  $\mu$ l of CdaA<sub>CD</sub> (5 mg/ml), GlmM (24 mg/ml) and the complex CdaA<sub>CD</sub>:GlmM (24 mg/ml) and the CdaA<sub>CD</sub>:GlmM<sub>F369</sub> complex (10 mg/ml) were injected onto a high pressure Shodex column coupled to the B21 Small-Angle X-Ray beamline at the Diamond Light Source (Didcot, UK). The data analysis and envelope reconstruction were performed using ScÅtter (51). The program Chimera (53) was used to visualise the reconstructed envelopes as maps into which the protein structures were fitted. *A*, SAXS envelope of the *B. subtilis* CdaA<sub>CD</sub> protein with a CdaA<sub>CD</sub> dimer protein structure fitted into the envelope. *B*, SAXS envelope of the *B. subtilis* GlmM protein with the GlmM protein dimer structure fitted into the envelope. *C*, SAXS envelope of the *B. subtilis* CdaA<sub>CD</sub>:GlmM complex with a CdaA<sub>CD</sub>:GlmM dimer model structure fitted into the envelope. *D*, SAXS envelope of the *B. subtilis* CdaA<sub>CD</sub>:GlmM<sub>F369</sub> complex with the structure of CdaA<sub>CD</sub>:GlmM<sub>F369</sub> dimer complex fitted into the envelope.

931

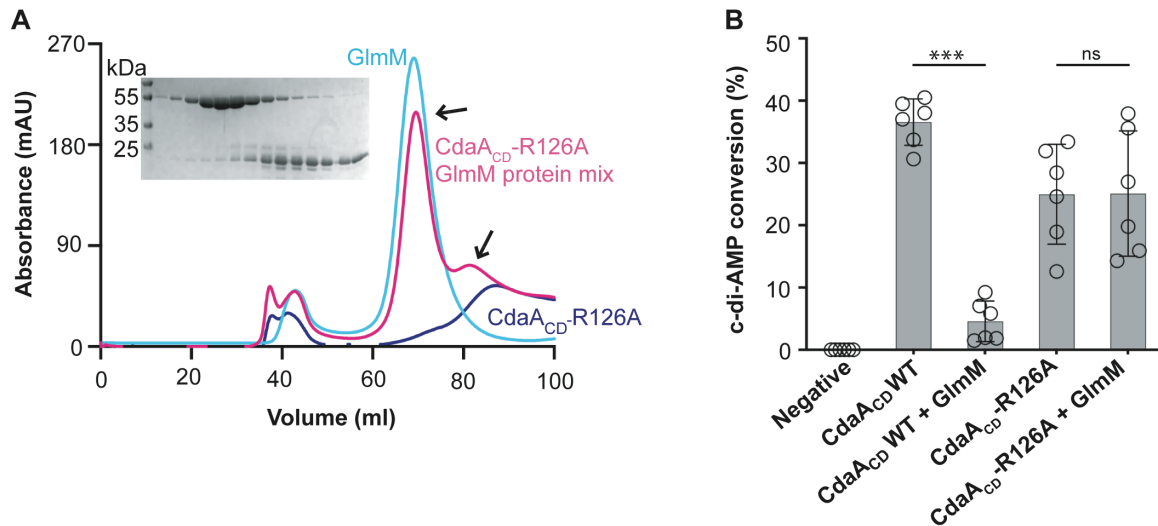

932

933

934

935

936

937

938

939

940

941

942

943

944

945

946

947

948

949

**Figure 7: Residue Arg126 in *B. subtilis* CdaA<sub>CD</sub>-R126A is important for complex formation with GlmM.** *A*, FPLC chromatograms and SDS-PAGE gel analysis of the *B. subtilis* CdaA<sub>CD</sub>-R126A, GlmM and a mix of both proteins. The *B. subtilis* CdaA<sub>CD</sub>-R126A, GlmM and the CdaA<sub>CD</sub>-R126A/GlmM protein mixture were purified by Ni-affinity chromatography and size-exclusion chromatography. The FPLC elution profiles, recorded at a wavelength of 280 nm, are shown for CdaA<sub>CD</sub>-R126A (blue), GlmM (cyan) and the CdaA<sub>CD</sub>-R126A/GlmM mixture (pink). Proteins from the peak fractions of the CdaA<sub>CD</sub>-R126A/GlmM sample were separated on a 12% SDS PAGE gel and proteins visualized by coomassie staining (shown in the insert). The experiments were performed in triplicates and representative chromatograms and gel images are shown. *B*, Enzymatic activity of wild type CdaA<sub>CD</sub> and the CdaA<sub>CD</sub>-R126A protein variant in the absence or presence of GlmM. Enzyme activity assays were performed with 5  $\mu$ M purified CdaA<sub>CD</sub> or CdaA<sub>CD</sub>-R126 in absence or presence of 10  $\mu$ M GlmM protein. After 4 h of incubation, the reactions were stopped, separated by TLC and the percentage conversion of radiolabelled ATP to c-di-AMP determined. The average values and SDs from six experiments were plotted. T-tests were performed to determine statistically significant differences in enzyme activity of CdaA<sub>CD</sub> or CdaA<sub>CD</sub>-R126A in the absence or presence of GlmM. ns indicates not statistically significant; \*\*\* indicates  $p < 0.001$ .
